# Optimizing mitochondrial maintenance in extended neuronal projections

Anamika Agrawal<sup>1</sup>, Elena F. Koslover<sup>1\*</sup>,

<sup>1</sup> Department of Physics, University of California, San Diego, La Jolla, California, USA

\* [ekoslover@physics.ucsd.edu](mailto:ekoslover@physics.ucsd.edu)

## Abstract

Neurons rely on localized mitochondria to fulfill spatially heterogeneous metabolic demands. Mitochondrial aging occurs on timescales shorter than the neuronal lifespan, necessitating transport of fresh material from the soma. Maintaining an optimal distribution of healthy mitochondria requires an interplay between a stationary pool localized to sites of high metabolic demand and a motile pool capable of delivering new material. Interchange between these pools can occur via transient fusion / fission events or by halting and restarting entire mitochondria. Our quantitative model of neuronal mitostasis identifies key parameters that govern steady-state mitochondrial health at discrete locations. Very infrequent exchange between stationary and motile pools optimizes this system. Exchange via transient fusion allows for robust maintenance, which can be further improved by selective recycling through mitophagy. These results provide a framework for quantifying how perturbations in organelle transport and interactions affect mitochondrial homeostasis in neurons, a key aspect underlying many neurodegenerative disorders.

## Author summary

Neurons contain long projections termed axons and dendrites and a small central body that is responsible for much of cellular biosynthesis. Mitochondria, the energy hubs of a cell, are synthesized in the soma and actively transported to distant sites of high energy demand. Given the extreme distances between these sites and the soma, maintaining distal mitochondrial health poses a substantial challenge. Defects in mitochondrial transport and maintenance are associated with several neurological disorders.

Fortunately, mitochondria stationed at distant sites can be ‘serviced’ by passing mitochondria that emerge from the soma and move around the neuron. We develop mathematical models for two strategies of mitochondrial maintenance: one with direct protein exchange between moving and stationary mitochondria (‘Space Station’) and the other with moving mitochondria occasionally replacing stationary ones at the demand sites (‘Changing of the Guard’). We find that only a few servicing events and a small motile pool form optimal conditions for maintaining mitochondrial health. The system can be improved further by selectively removing and recycling some unhealthy mitochondria. Our results are consistent with observations of mitochondrial behavior in neurons and form a basis for future quantitative study of mitochondrial maintenance.

## Introduction

Mammalian neurons, with their complex and elongated architecture, pose a unique challenge for the delivery and maintenance of cellular components. Their relatively small cell body (soma) contains the nucleus and is responsible for synthesizing all the mRNA transcripts and a large portion of the proteins delivered to distal regions [1,2]. For some proteins, local translation at distal outposts has been shown to play an important role in maintaining homeostasis [3–5]. However, this approach still requires the long-range delivery of mRNA from the nucleus [6–8]. Neurons thus rely on packaging components into vesicular organelles or RNA-protein granules, which are actively transported by molecular motors moving along microtubule tracks to the most distant regions of the cell. Such long-distance transport is critical for neuronal growth and repair [9–11], synapse formation and function [12–14], and synaptic plasticity [15,16]. Furthermore, transport is required to maintain steady-state homeostasis of protein and mRNA levels. While neurons can have a lifespan of decades, the turnover of active mRNA is thought to happen on timescales of hours [17], and proteins are degraded over the course of a few days [18]. Efficient, perpetual delivery through transport from the cell body is thus required to replenish degraded components and maintain neuronal function.

A particular challenge for cellular homeostasis is supplying the spatially heterogeneous metabolic needs of neuronal projections. These projections, which stretch up to several hundred microns for dendrites and over a meter for axons, contain localized structures with elevated metabolic demand. For example, distal axonal structures such as presynaptic terminals and growth cones are known to have especially high ATP needs [19,20]. In myelinated axons, the nodes of Ranvier can be separated by hundreds of microns [21] and contain high concentrations of ion pumps that are thought to correspond to locally elevated metabolic demand [22]. Postsynaptic dendritic spines also have high metabolic needs to support both ion pumping and local translation needed for proteostasis and plasticity [23,24].

Reliable ATP production at sites of high metabolic demand is believed to rely on the localization of nearby mitochondria. These organelles serve as ATP-generating powerhouses and also help maintain  $\text{Ca}^{+2}$  homeostasis in the cytoplasm. Locally stationed mitochondria are a key source of fuel to power activity-dependent protein synthesis in dendritic compartments [23]. Mitochondria are also known to accumulate in presynaptic terminals [25] and in juxtaparanodal regions next to nodes of Ranvier in myelinated axons [26,27]. Mitochondria are manufactured primarily in the soma [28] and delivered throughout neuronal projections via motor-driven transport [29,30]. Delivery of mitochondria to specific regions relies on localized signals that trigger halting and switching into a stationary state. Several mechanisms for stopping motile mitochondria have been identified [30], including  $\text{Ca}^{+2}$ -dependent immobilization [31], glucose-dependent arrest [32], and syntaphillin-based anchoring [33]. Interestingly, 60-90% of axonal mitochondria are observed to be stationary, while the remainder are roughly equally split between an anterograde and retrograde motile population [30].

Mitochondria are one of many neuronal components whose delivery relies on local stop signals rather than a global addressing system. Dense core vesicles carrying neuropeptides [34] and RNA-protein particles [15] are distributed by sporadic capture at sequential synaptic sites as they circulate through the dendrites. Such delivery systems have been described by a “sushi belt model”, where local sites trigger removal of components from an effective constantly moving conveyor belt [15,35]. Quantitative analysis of the sushi belt model indicates that these systems face severe trade-offs between speed and accuracy, so that frequent halting interferes with the ability of transported components to reach the most distal regions [35]. The efficiency of a sushi-belt delivery system in steady-state replenishment of degrading components has not previously been addressed, and forms a key aspect of the current work.

The placement of stationary mitochondria at distal regions raises a challenging problem of “mitostasis” (mitochondrial homeostasis) [29]. Mitochondria are known to age over time, decreasing their membrane potential and ATP production efficiency [36], possibly as a result of damage caused by reactive oxygen species [37]. Defects in mitochondrial transport and quality control are associated with a variety of neurological diseases, including Alzheimer’s, Huntington’s, and Parkinson’s disease [38,39]. Individual mitochondrial proteins have typical half-lives in the range of 2-14 days [18,40]. Because most mitochondrial proteins are encoded in the nucleus, this implies that a distally stationed mitochondrion will experience significant degradation of its protein complement over the days to weeks time-scale. While local translation may replenish some of this protein content, not all proteins are translated locally and only 30% of mRNA transcripts have been found outside the cell body [41]. Moreover, for the proteins that are synthesized locally, the protein synthetic capacity per unit volume of axons has been observed to be 10% of the soma [2]. Maintenance of a healthy population of mitochondria thus requires the continual delivery of new mitochondrial material to distal outposts. While some of this delivery could be accomplished by vesicular transport followed by local import, most nuclear-derived mitochondrial content is believed to be transported by a motile population of mitochondria themselves [29,30].

Two main qualitative models have been proposed for the replenishment of aging neuronal mitochondria through long-range transport [29]. One, termed the ‘Changing-of-the-Guard’ (CoG) model, relies on individual mitochondria switching between the stationary and the motile pools. This enables newly synthesized mitochondria moving anterograde from the cell soma to halt at regions of high metabolic demand, while stationary mitochondria begin moving again to reach other regions or return to the soma for recycling. An alternative approach is the ‘Space Station’ (SS) model, in which a pool of mitochondria remains permanently stationed at distal sites. In this model, new protein components are delivered by passing motile mitochondria that undergo transient fusion and fission events with the stationary organelles.

Fusion and fission dynamics enable the exchange of membrane and matrix contents between distinct mitochondria [42–44]. In certain cell types, fusion allows the formation of extended mitochondrial networks that have been hypothesized to contribute to the efficient mixing of components that determine mitochondrial health [45,46]. In neuronal axons, extensive fusion into a mitochondrial network is not observed but transient kiss-and-run events, consisting of a rapid fusion and fission cycle between two passing mitochondria, can nevertheless allow for component exchange [47,48].

Neuronal mitostasis is also facilitated by a recycling pathway termed “mitophagy” [49]. In this pathway, unhealthy mitochondria with low membrane potential are marked by an accumulation of protein kinase PINK which recruits ubiquitin ligase Parkin, leading to ubiquitination of the mitochondrial surface [30,49]. Autophagosomes (originating primarily at distal cell tips) move in the retrograde direction, engulf tagged damaged mitochondria, and carry them back to the cell body for recycling [29,50].

Past theoretical studies of mitochondrial maintenance have focused on systems with extensive mitochondrial fusion and asymmetric fission [51,52]. When mitochondrial health is determined by discrete factors in low copy numbers, fission events can stochastically result in particularly unhealthy daughter mitochondria that can then be targeted for degradation through mitophagy. The combination of discrete health units and selective autophagy has been shown to be sufficient for maintaining a healthy mitochondrial population [51,52]. Recent studies have also begun to explore the role of spatial distribution, with randomly directed active transport and proximity-dependent fusion [52]. However, no quantitative model has yet attempted to address mitochondrial maintenance in the uniquely extended geometry of neuronal projections. This cellular system relies on long-range mitochondrial transport and faces the challenge

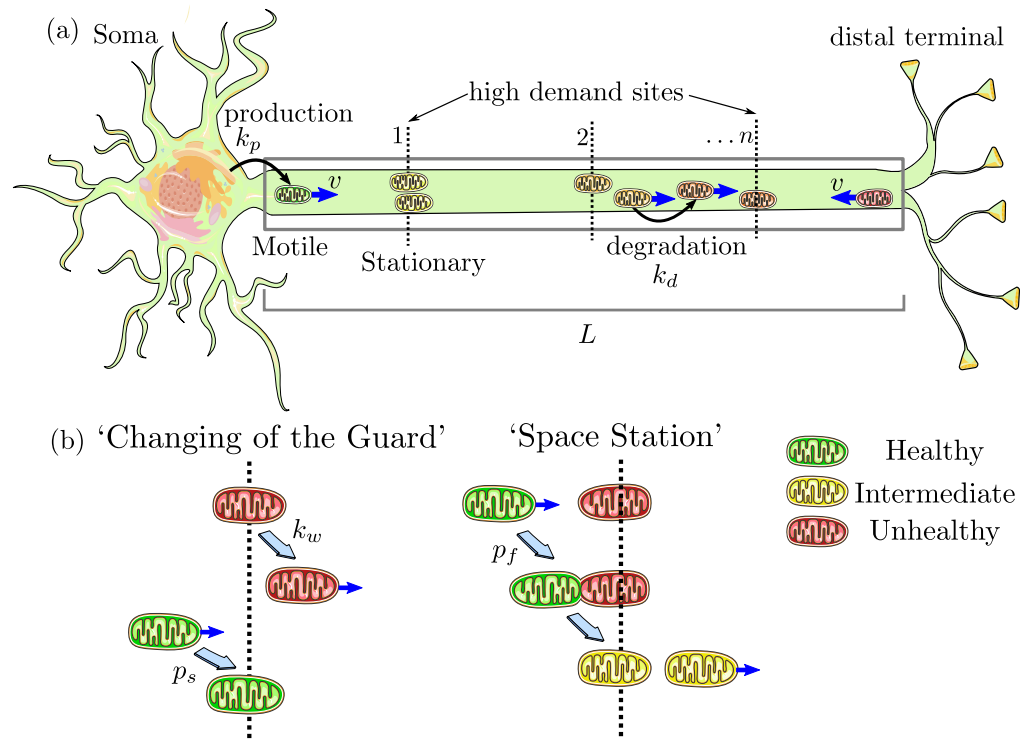

**Fig 1.** Schematic of quantitative models for mitochondrial maintenance in long neuronal projections. (a) Mitochondria are produced at the soma at rate  $k_p$ , move processively with velocity  $v$ , and can stop at one of  $n$  discrete sites with high metabolic demand. Mitochondrial health degrades continuously with rate  $k_d$ . Gray box represents the modeled linear domain of length  $L$ . (b) Two models for mitochondrial exchange at demand sites. In the CoG model, stationary mitochondria re-enter the motile population with rate  $k_w$  while passing motile mitochondria stop with probability  $p_s$ . In the SS model, transient fusion events occur with probability  $p_f$  each time a motile mitochondrion passes a permanently stationary one. [53]

of positioning mitochondria at specific distal regions of high metabolic demand. 105

In this work, we develop quantitative models for the coupling between mitochondrial 106  
transport and mitochondrial homeostasis in neuronal projections. We treat 107  
mitochondrial health as a continuously decaying parameter along the axon and assume 108  
that the generation of some of the critical mitochondrial material essential for health 109  
(such as proteins) is limited to the cell body. Our models encompass both the ‘Space 110  
Shuttle’ and the ‘Changing-of-the-Guard’ qualitative mechanisms for mitochondrial 111  
exchange. In contrast to past work [52], we focus not only on total mitochondrial 112  
health, but also on the distribution of healthy mitochondria among localized distal 113  
regions of high metabolic demand. The balance between mitochondrial transport and 114  
localization, in the face of decaying mitochondrial health, serves as a bridge between 115  
spatially-resolved models of neuronal distribution [34, 35] and global models of 116  
mitochondrial maintenance [51, 52]. 117

We leverage both analytically tractable mean-field methods and discrete stochastic 118  
simulations to explore the equivalence between the SS and CoG mechanisms, delineate 119  
the parameter values that maximize mitochondrial health, and establish the existence of 120  
an optimum health threshold for mitophagy. This modeling effort fills a gap in our 121  
existing understanding of how neurons accommodate the trade-offs inherent in 122  
maintaining mitochondrial homeostasis while positioning mitochondria in regions far 123

distant from the primary site of protein and organelle biogenesis.

## Models for mitochondrial maintenance

Two inherent constraints pose a challenge for maintaining distal mitochondrial outposts in a linearly extended region such as mammalian axons. First, mitochondrial health is assumed to be dependent on components (*eg*: proteins) that degrade rapidly compared to the cell lifespan and must be manufactured primarily in the cell soma at one end of the domain. Although a variety of factors may contribute to mitochondrial aging [54], we simplify our model to consider the overall health as decaying with a single rate constant  $k_d$ . This may correspond, for instance, to the decay rate of a limiting protein component or to the overall decay in mitochondrial membrane potential.

Second, we assume the existence of discrete “demand sites” interspersed throughout the domain, which have a particularly high need for a healthy population of localized mitochondria. For simplicity, we treat the demand sites as very narrow slices of the domain and focus on mitochondrial health specifically within those slices – an extreme form of spatial heterogeneity in metabolic demand. In the opposite extreme of wholly homogeneous metabolic demand, the optimum maintenance strategy becomes simple: all mitochondria should move back and forth through the cell as rapidly as possible (within the limits of other constraints such as energetic requirements of transport) in order to ensure frequent replenishment of proteins at the cell soma.

In a system with discrete demand sites, optimizing metabolism requires the establishment of a population of stationary mitochondria specifically at those sites. However, this stationary population must be continuously replenished by a flux of either new proteins or entirely new mitochondria. We develop two quantitative models for mitochondrial replenishment (the SS and CoG model, illustrated in Fig. 1), in keeping with recent qualitative proposals for mitochondrial maintenance mechanisms [29].

In both cases, we assume that there are  $n$  discrete point-like demand sites at positions  $x_i$ , placed at equal separations over a linear domain of length  $L$  (Fig. 1a). This long linear domain mimics the extended axonal regions imaged in cell cultures [32] and serves as a simplification that enables us to focus on the interplay of dynamic processes for determining mitochondrial homeostasis. The effect of more complicated branched geometries observed *in vivo* is left for future work.

We treat individual mitochondrial health as a continuous quantity that is set to 1 when the mitochondrion leaves the cell body and decays exponentially at a single constant rate  $k_d$  as it travels down the axon. This health can be thought of as proportional to the copy number of an unspecified critical mitochondrial protein that is manufactured in the soma and is turned over during the lifetime of the mitochondrion. Other studies have also focused on the membrane potential and the accumulation of mutations in mitochondrial DNA as markers for mitochondrial health [51,52]. With an appropriate change of units, the mitochondrial health in our model can equivalently represent any of these quantities, requiring only that they change in a continuous manner, with a single well-defined decay rate.

The metabolic health at each demand site ( $H_i$ ) is given by the total protein content for all mitochondria stationed at the site. Since each site is assumed to be very narrow (on the order of a few microns in an axonal length of mm to cm), the motile mitochondria spend negligible time at these sites and can be neglected from our calculations of demand site health. We consider two utility functions for overall metabolic health. The first is  $\langle H \rangle = \frac{1}{n} \sum_{i=1}^n H_i$ , the average health over all demand sites. The second is the health level at the most distal demand region ( $H_n$ ), which serves as the minimum value across all the sites. Optimizing  $\langle H \rangle$  corresponds to maximizing the sum total metabolic rate in many regions of interest. Such an optimum

could correspond to an uneven distribution of mitochondrial health between individual regions, with the distal demand sites being poorly supplied, while the proximal sites maintain a high health level. By contrast, optimizing  $H_n$  ensures that each individual region exhibits, to the greatest extent possible, a high level of mitochondrial health. Increasing the total number of mitochondria in the domain ( $M$ ) will predictably raise both metrics. At the same time, requiring a fixed total number of mitochondria to service a greater number of demand sites should decrease the average health at each site. Consequently, we normalize the demand-site health levels by the total number of mitochondria per site:

$$\hat{H}_i = H_i/(M/n), \quad \langle \hat{H} \rangle = \frac{1}{n} \sum_{i=1}^n \hat{H}_i \quad (1)$$

An individual mitochondrion can either be motile (moving with velocity  $\pm v$ ) or stationary (at one of the demand sites). For simplicity, we neglect transient pausing of motile mitochondria and treat them as having a constant effective velocity outside of the demand regions. In keeping with experimental observations of axonal mitochondria [55], a motile mitochondrion is assumed to move processively in the anterograde or retrograde direction, with no switching of directionality in the bulk of the domain. This assumption is relaxed in the Changing-of-the-Guard model, where stationary mitochondria can restart in either the anterograde or retrograde direction. The fate of mitochondria when they reach the terminus of an axon may involve some combination of local degradation [56] and recirculation towards the soma [57–59]. Given that the retrograde and anterograde flux of mitochondria are similar in axons [32, 58, 60], we assume that most of the organelles return to the cell body for recycling. Modeled mitochondria that reach the end of the domain (length  $L$ ) are thus assumed to instantaneously switch to retrograde motion. A retrograde mitochondrion that returns to the soma at  $x = 0$  is removed from the domain. To maintain a steady-state total mitochondrial number, anterograde mitochondria with full health are produced at the somal end with rate  $k_p$ .

The difference between the two models lies in the ability of individual mitochondria to switch between stationary and motile pools or to exchange protein content with other mitochondria, as described below.

## Changing-of-the-Guard (CoG) model

One mechanism for maintaining a healthy population of localized mitochondria is by allowing occasional interchange between the pool of motile mitochondria and those stationed at demand regions. In the absence of fusion and protein exchange, motile mitochondria are generally younger and healthier than stationary ones, and the latter must be removed and recycled sufficiently quickly to maintain overall mitochondrial health at the regions of interest.

The simplest version of this model assumes that the rate of restarting stationary mitochondria is independent of their health or demand site position along the axon. An expanded version that incorporates mitophagy to selectively remove unhealthy mitochondria is considered in a subsequent section. Here, we assume each moving mitochondrion has a constant probability  $p_s$  for switching to the stationary state each time it passes a demand region. A stationary mitochondrion restarts motility with fixed rate constant  $k_w$ . Upon re-entering the motile state, it is equally likely to move in either the anterograde or retrograde direction. Stochastic agent-based simulations of this model are illustrated in Fig. 2a and Supplemental Video S1.

A mean-field description of this model tracks the behavior of  $H^\pm(x, t)$  (the linear density of mitochondrial health moving in the anterograde ( $H^+$ ) and retrograde ( $H^-$ ))



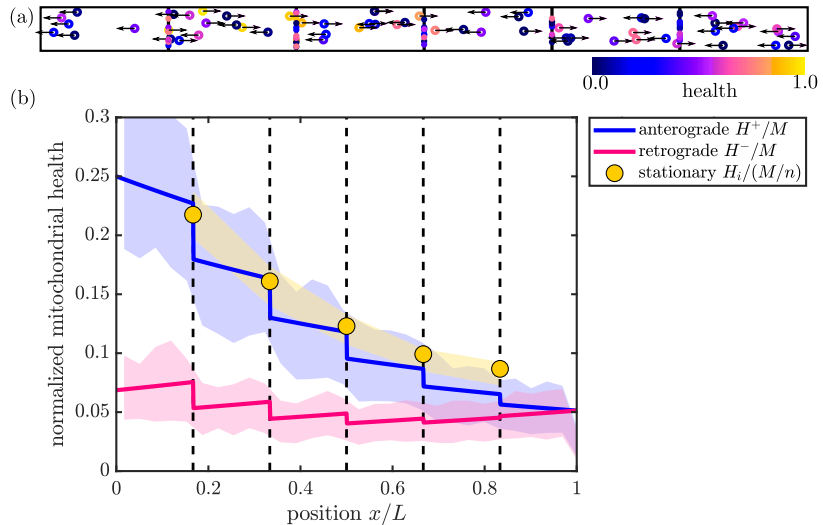

**Fig 2.** Comparison of mean-field and discrete stochastic models. (a) Snapshot of stochastic simulation of the CoG model, with  $M = 100$ . (b) Steady-state solution for mitochondrial health in the CoG model (Eq. 2). Solid curves show linear density of mitochondrial health in anterograde (blue) and retrograde (magenta) mitochondria, normalized by total number of mitochondria in the domain. Yellow circles show total health at each of the discrete demand sites (dashed black lines), normalized by the total number of mitochondria per region. Shaded regions show corresponding quantities from discrete stochastic simulations (mean  $\pm$  standard deviation) with  $M = 1500$  mitochondria in the domain. Parameters used in (a) and (b):  $n = 5, p_s = 0.4, f_s = 0.5$ . Corresponding results for the SS model are provided in Supporting Information ( S1 Fig).

directions) and  $H_i$  (the total health of stationary mitochondria at demand site  $i$ ). These quantities evolve according to the following set of equations:

$$\frac{dH^\pm}{dt} = \mp v \frac{\partial H^\pm}{\partial x} - k_d H^\pm \quad (2a)$$

$$\frac{dH_i}{dt} = v p_s [H^+(x_i^-) + H^-(x_i^+)] - (k_d + k_w) H_i \quad (2b)$$

$$v H^\pm(x_i^\pm) = v H^\pm(x_i^\mp) (1 - p_s) + \frac{1}{2} k_w H_i \quad (2c)$$

$$H^+(L) = H^-(L) \quad (2d)$$

$$v H^+(0) = k_p. \quad (2e)$$

Equation 2a describes transport and decay of health (or protein content) in motile mitochondria. The distributions  $H^\pm(x, t)$  are continuous on each interval  $(x_i, x_{i+1})$ , with discontinuities at the demand sites. Equation 2b encompasses switching between the stationary and motile populations, with  $H^\pm(x_i^-), H^\pm(x_i^+)$  referring to the limit of the distribution approaching the  $i^{\text{th}}$  site from the negative and from the positive side, respectively. Equation 2c gives the boundary condition at each demand site, where the flux of outgoing proteins from one side of the site must equal the flux of incoming proteins that pass without stopping from the other side, as well as the flux of stopped proteins that re-enter the motile state in that direction. Equation 2d describes switching of anterograde to retrograde motile mitochondria at the distal end of the domain. Finally, Eq. 2e gives the production rate of healthy mitochondria at the proximal end of the domain, assuming a health level of 1 for each newly-made mitochondrion.

The distribution of mitochondria themselves obeys the same set of equations (Eq. 2) with the  $k_d$  terms removed. We define  $\rho$  as the steady-state density of all motile mitochondria and  $S$  as the steady-state number of stationary mitochondria at each demand site. At steady state,  $\rho$  is constant throughout the domain and  $S$  is the same in all demand sites, with

$$\rho = 2k_p/v, \quad S = v\rho p_s/k_w. \quad (3)$$

The total number of mitochondria in the domain is given by  $M = \rho L + nS$ . We use the total mitochondria  $M$  as a control parameter in our models, allowing  $k_p$  to vary as needed in order to maintain a given value of  $M$ . This approach represents a system where the total mitochondrial content in the domain is limited, so that increasing the number of stationary mitochondria comes at the expense of having a smaller motile population. The fraction of mitochondria in the stationary pool is defined as  $f_s$  and can be expressed as

$$f_s = \frac{nS}{M} = \frac{nv\rho p_s}{Lk_w + nv\rho p_s}. \quad (4)$$

At steady state, Eq. 2 can be solved analytically to give the distribution of mitochondrial health throughout the domain and at each demand site (Fig. 2b; see Materials and Methods for details). The mean-field model accurately describes the steady-state distributions when averaged over many realizations of stochastic trajectories for discrete mitochondria (Fig. 2b).

In each of the regions between demand sites, the steady-state anterograde protein density drops exponentially as  $e^{-xk_d/v}$  with distance from the soma. The reverse relationship holds for retrograde-moving protein density, which decreases exponentially towards the soma. It should be noted that the overall mitochondrial health decreases with increasing distance from the soma – a fundamental consequence of long-range transport and continual protein turnover. Interestingly, a modest correlation between mitochondrial aging and distance from the nucleus has been experimentally observed in hippocampal neurites [61]. Furthermore, some measurements indicate that retrograde-moving mitochondria have lower health than anterograde ones [62] as also seen in Fig. 2.

## Space Station (SS) model

An alternate approach to mitochondrial homeostasis relies on maintaining a pool of permanently stationed mitochondria in each demand region, whose contents can be replenished by transient fusion and fission with the motile population. Such transient ‘kiss-and-run’ events have been observed to allow for exchange of mitochondrial membrane and matrix proteins in rat cardiomyocytes [47].

In our quantitative Space Station model, permanently stationary mitochondria are placed at the high demand sites, with  $S = Mf_s/n$  mitochondria per site. We assume the mitochondria maintain their discrete identities following a transient fusion/fission event, and that the protein content of the two mitochondria is fully equilibrated in each such event. Every time a motile mitochondrion passes a demand site, it has the opportunity to fuse with each of the stationary mitochondria present at that site, in sequence. Each transient fusion/fission event is successful with probability  $p_f$ , and the choice to fuse with each stationary mitochondrion is independent of health levels or prior fusion events. Following an instantaneous fusion/fission cycle, the health levels of the mitochondria are equilibrated, so that a protein in a motile mitochondrion has probability  $p_f/2$  of switching to a stationary one each time there is a passage event. The rate at which a stationary protein re-enters a motile state in this model is given by



$p_f/2$  times the flux of motile mitochondria passing the stationary organelle containing that protein. At steady state, this gives an effective restarting rate of

$$\hat{k}_w = \frac{p_f}{2} v \rho = \frac{p_f v M (1 - f_s)}{2L}, \quad (5)$$

where  $\rho$  is the linear density of motile mitochondria and  $f_s$  is the fraction of mitochondria in the permanent stationary state.

The mean-field equations for the SS model are derived in the Methods section. For the case with only one mitochondrion per site ( $S = 1$ ), they are mathematically equivalent to the CoG model, with the variable replacements  $p_s \rightarrow p_f/2$  and  $k_w \rightarrow \hat{k}_w$ .

Stochastic simulations of the SS model with discrete mitochondria are illustrated in Supplemental Video S2, and the resulting steady-state mitochondrial health matches well to the mean-field model (S1 Fig).

## Model comparison

In order to compare the efficiency of mitochondrial maintenance via the CoG and SS models, we must first consider the different control parameters involved. The parameters  $k_d$  (protein decay rate),  $M$  (total mitochondria),  $N$  (number of demand sites),  $v$  (motile mitochondria speed), and  $L$  (domain length) play the same role in both models. The CoG model is further parameterized by  $k_w$  (restarting rate for a stationary mitochondrion) and  $p_s$  (stopping probability for motile mitochondrion at each demand site). The SS model, on the other hand, has the parameters  $S$  (fixed number of stationary mitochondria per site) and  $p_f$  (probability of fusion with each stationary mitochondrion). These last two parameters define two key features of the maintenance mechanism: the steady-state fraction of mitochondria in the stationary pool ( $f_s$ ), and the probability that a protein within a motile mitochondria will transition into a stationary state while passing each demand site ( $\hat{p}_s$ ). If these two control parameters are fixed, then for the CoG model we have  $p_s = \hat{p}_s$  and  $f_s$  given by Eq. 4. For the SS model, we set  $f_s = nS/M$  directly. Because a motile mitochondrion has the opportunity to fuse sequentially with multiple stationary organelles at each demand site, the overall probability that a protein will transition to a stationary state at that site is given by

$$\hat{p}_s = 1 - (1 - p_f/2)^S, \quad (6)$$

allowing a corresponding  $p_f$  value to be set for each effective stopping probability  $\hat{p}_s$ .

When there is just one mitochondrion stationed in each demand site ( $S = 1$ ), the two mean-field models become mathematically identical for fixed values of  $f_s$  and  $\hat{p}_s$ . In general, the two models give very similar results so long as the stopping probability at each demand site is small ( $\hat{p}_s \lesssim 0.5$ ), as shown in Fig. 3. In this limit,  $p_f \approx 2\hat{p}_s/S$  and  $\hat{k}_w \approx k_w$  (from Eq. 4–5). For large values of  $\hat{p}_s$ , the SS model is seen to yield slightly lower mitochondrial health than the CoG model (Fig. 3). It should be noted that for a fixed value of  $f_s$ , the SS model can only reach a limited maximum value of the effective stopping probability  $\hat{p}_s$ . In fact, even if fusion events occur with each stationary mitochondrion ( $p_f = 1$ ), a motile mitochondrial component always has a non-zero chance of continuing in its motile carrier rather than being left behind at the demand site. In the remainder of this work, we focus primarily on low values of  $\hat{p}_s$ , a regime where the two models give essentially equivalent mean-field results.

To reduce the number of relevant model parameters, we can apply dimensional analysis, non-dimensionalizing all length units by the domain length  $L$ , and time units by  $L/v$  (the time for a motile mitochondrion to traverse the domain). The remaining dimensionless parameters are the non-dimensionalized decay rate  $\hat{k}_d = k_d L/v$ , the

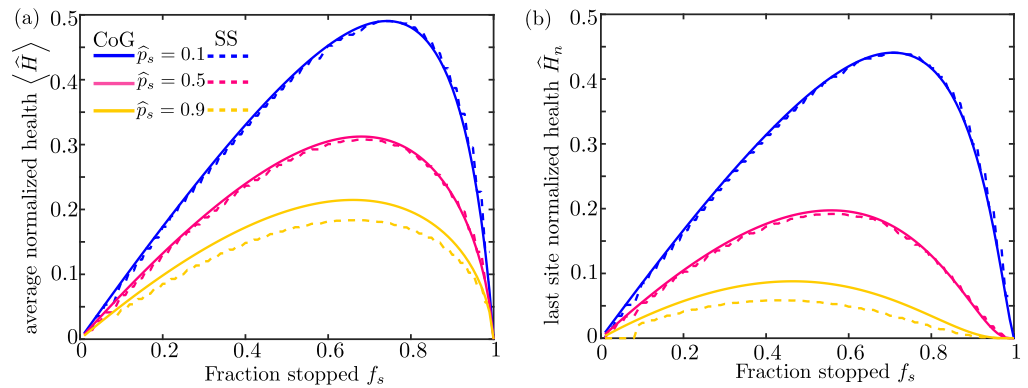

**Fig 3.** Comparison of mitochondrial maintenance models for matched parameter values. (a) Steady-state normalized mitochondrial health averaged over all demand regions is computed with the CoG model (solid lines) and the SS model (dashed lines) as a function of the fraction of stopped mitochondria ( $f_s$ ) for three different values of the effective protein stopping probability  $\hat{p}_s$ . (b) Corresponding plots of the normalized health in the most distal demand site, for both models. All values are computed with  $M = 1500$ ,  $\hat{k}_d = 0.06$ , and  $n = 30$ .

number of mitochondria in the domain  $M$ , the number of demand sites  $n$ , the fraction of mitochondria in the stationary population  $f_s$ , and the effective protein stopping probability at each demand site  $\hat{p}_s$ .

In the CoG model, the total number of mitochondria is directly proportional to the production rate  $k_p$ , which sets the boundary condition at the proximal edge of the domain (Eq. 2). Consequently, the normalized health values  $\langle \hat{H} \rangle$  and  $\hat{H}_n$  (which are scaled by the number of mitochondria per site) are independent of the total number of mitochondria in the system. The same relationship is seen for the SS model (S2 Fig). The chosen normalization implies that the total amount of mitochondrial material in the cell is limited by other constraints, and that we are interested in modeling the overall mitochondrial health for a particular fixed number of total mitochondria.

In both maintenance models, mitochondrial proteins are removed from the system via two mechanisms: they undergo decay (with rate  $\hat{k}_d$ ) or they are recycled in the soma when a motile mitochondrion returns to its starting point. The total protein content in the system therefore depends on the time-scale for a given protein to return to the soma, and hence on the number of stops made by a given protein in the domain. The average total number of stops during a protein's back and forth journey through the cell is given by  $N_s = 2\hat{p}_s n$ . As shown in Figure 4, it is this parameter rather than the specific number of regions  $n$  and stopping probability  $p_s$  that primarily determines the mitochondrial health at each demand site.

For the maintenance models proposed here, there are thus three primary parameters of relevance: the protein decay rate  $\hat{k}_d$ , the fraction of stationary mitochondria  $f_s$ , and the number of stops expected for an individual protein while moving along the domain  $N_s$ . The dimensionless decay rate  $\hat{k}_d$  indicates how much health decay is expected for a mitochondrion that moves without stopping down an entire axon. Its value depends on the protein lifetime (a few days for mitochondrial proteins [18, 40]), the average speed of motile mitochondria ( $\sim 0.5\mu\text{m/s}$  [55]), and the length of the axon itself. Axon lengths can vary widely, from hundreds of microns up to the meter-long axons in the human sciatic nerve [29]. Because mitochondrial maintenance is particularly challenging when mitochondria must be stationed far away from the cell nucleus, we focus here on long axons in the range of 1 – 10cm. This range corresponds approximately to the average

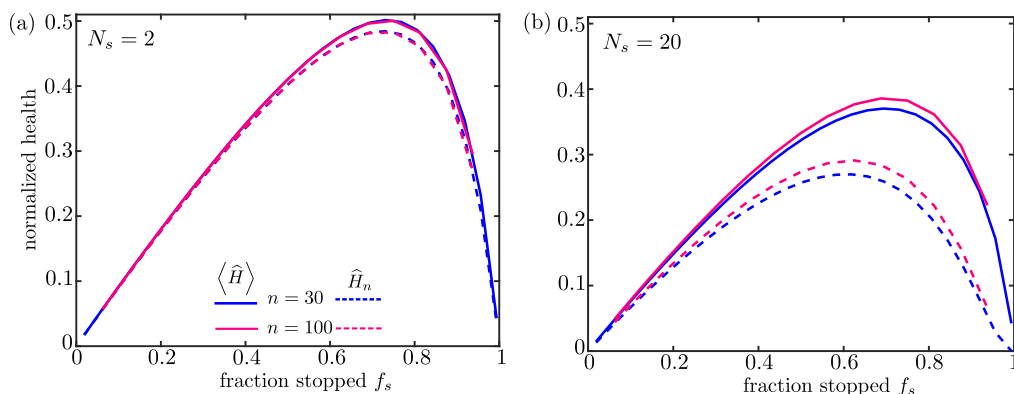

**Fig 4.** Mitochondrial health as a function of key dimensionless parameters. Solid curves show normalized average health over all demand sites; dashed curves show normalized health at the most distal site. The number of demand sites is set to  $n = 30$  (blue) or  $n = 100$  (magenta). For each fraction of stationary mitochondria the fusion probability is adjusted to give a fixed number of stopping events for an individual protein traversing the domain: (a)  $N_s = 2$  and (b)  $N_s = 20$ . All values shown are for the SS model, with  $M = 1600$  and  $\hat{k}_d = 0.06$ . Results for different values of  $M$  are provided in Supporting Information ( S2 Fig).

axon lengths measured in callosal neurons in monkey and human brains [63].  
 Estimating  $k_d \approx (4\text{days})^{-1}$  and  $v \approx 0.5\mu\text{m/s}$ , this gives dimensionless decay rates of  
 $\hat{k}_d \approx 0.06 - 0.6$ .

## Optimizing mitochondrial maintenance

We consider the average health of the system as a function of the mitochondrial transport parameters  $f_s$  and  $N_s$  (Fig. 5). An optimal value of the average health is observed at intermediate values of both the stopped fraction and the number of stopping events. When too few mitochondria are in the stationary state (low  $f_s$ ), then the total health at the demand regions is low simply because there are very few mitochondria present in those narrow regions. On the other hand, if too many mitochondria are stationary (high  $f_s$ ), the pool of motile mitochondria available for replenishing decayed proteins at the demand sites becomes very sparse and the health of the system diminishes. The optimum with respect to  $f_s$  relies on the assumption that the total mitochondrial content in the domain is limited, and health levels are normalized by the fixed quantity  $M/n$ . Thus, there is inherently a trade-off between the stationary and motile populations.

Higher decay rates  $\hat{k}_d$  require a higher fraction of mitochondria to be motile in order to maintain optimal health. It should be noted that experimental quantification of neuronal mitochondria indicates that roughly 60 – 90% of mitochondria are in a stationary state [30], in keeping with the optimal values observed for cm-long axons (Fig. 5b,d).

For a fixed fraction of stopped mitochondria, low values of  $N_s$  (the number of stops made by a protein during its journey along the axon) correspond to a system with very rare interchange between the stationary and motile populations. Values that are too low result in little opportunity for healthy proteins newly synthesized in the soma to be delivered to the demand sites. By contrast, high values of  $N_s$  represent a system with very frequent interchange between the two populations. Overly frequent stopping events increase the probability that a protein in a healthy proximal demand site will be picked

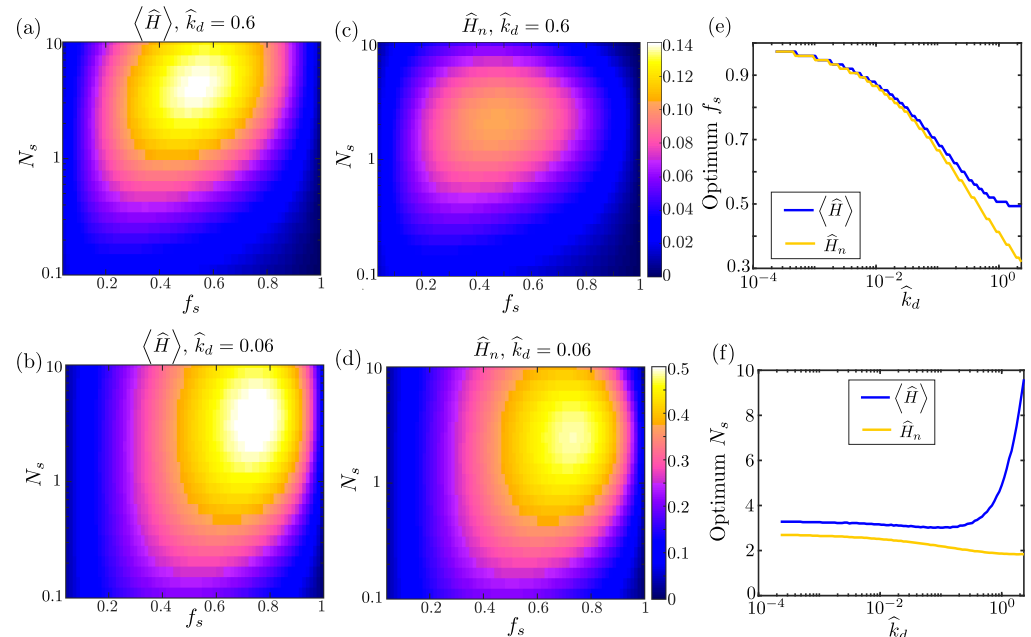

**Fig 5.** Optimizing mitochondrial health through variation of transport parameters. (a-b) Average health across all demand regions as a function of fraction of stopped mitochondria ( $f_s$ ) and number of stopping events ( $N_s$ ), for two dimensionless decay rates ( $\hat{k}_d$ ). (c-d) Mitochondrial health at the most distal demand site, for two different decay rates. (e-f) Values of the  $f_s$  and  $N_s$  parameters that correspond to maximum average health (blue curves) or last region health (yellow curves). Optimal parameters are plotted as a function of the decay rate. Results shown were computed for the CoG model.

up by a retrograde motile mitochondrion and carried back into the soma for recycling. 379

Similar behavior with respect to  $f_s$  and  $N_s$  is seen for the normalized health of the 380  
last region (Fig. 5c-d). The optimum stopped mitochondria fraction and number of 381  
stopping events are both shifted to slightly lower values in this case, making it more 382  
likely that a protein can successfully reach the most distal region without protracted 383  
stops along the way. 384

Figure 5e shows the optimal value for the stationary fraction  $f_s$  over a range of 385  
dimensionless decay rates  $\hat{k}_d$ . The optimum fraction of mitochondria in the stationary 386  
pool is high for very long-lived proteins. In the limit of no decay ( $\hat{k}_d \rightarrow 0$ ), all 387  
mitochondria can be kept permanently at the demand sites to maximize the health of 388  
the system. In the opposite limit of rapidly decaying proteins, the optimum stationary 389  
fraction for the average health approaches  $f_s \approx 50\%$ , indicating that mitochondria 390  
should be split evenly between motile and stationary pools. For the health of the 391  
most distal region, the optimal stationary fraction is slightly lower to allow for more motile 392  
mitochondria capable of reaching the end of the domain without extensive decay of their 393  
protein content. 394

In Figure 5f, we see that when the decay rate is relatively low ( $\hat{k}_d \leq 1$ ), with many 395  
proteins surviving a back and forth journey down the axon, optimum mitochondrial 396  
maintenance is achieved in the range  $N_s = 2 - 4$  stopping events. This approximate 397  
optimal  $N_s$  value is independent of specific values of the decay rate, number of demand 398  
sites, or total mitochondrial content. It relies only on the assumption of relatively slow 399  
protein decay, and the premise that protein exchange is blind to the current health or 400  
position of the mitochondria. We note that physiologically relevant values of the 401

dimensionless protein decay rate are expected to fall in the regime  $\widehat{k}_d \leq 1$ . A similar range for the optimal number of stopping events  $N_s$  is obtained when considering the health of the most distal demand region only. Our model thus robustly predicts that the transition of mitochondrial components from motile to stationary organelles at demand sites is expected to be rare (with only 2-4 stopping events during the entire journey along the axon), regardless of the specific model, the parameters chosen, or the relative contribution of different sites to the health of the system.

## Variability of mitochondrial health

Our calculations thus far quantify the mean-field steady-state levels of mitochondrial health in high-demand axonal regions. However, the instantaneous health at each site is inherently variable due to the stochasticity of mitochondrial dynamics. This variability arises from fluctuations in both the number of mitochondria and the health per mitochondrion in each region. A robust cellular distribution system may require high levels of mitochondrial health to be maintained over long time periods, rather than tolerating highly fluctuating health levels. At the same time, variability in the distribution of mitochondria may allow for a more rapid response to changing energy demand at the expense of decreased precision in mitochondrial positioning [35]. In neuronal dendrites, mitochondrial content in localized regions has been shown to fluctuate around a well-defined steady-state level [23], indicating that robust maintenance of healthy mitochondria in those regions (low fluctuations compared to average quantities) may be advantageous to the cell.

To understand the effect of stochasticity in our model, we turn to agent-based simulations. These simulations give the same average steady-state mitochondrial health as the mean-field calculations discussed previously (Fig. 2). We define the total health variability of our system ( $\sigma_H$ ) as the standard deviation in mitochondrial health per region  $\langle H \rangle$ , calculated over many iterations of the system after it has reached steady state. Although they exhibit the same average health levels for comparable parameter values, the normalized variability [ $\sigma_H / \langle H \rangle$ ] is very different for the two maintenance models (Fig. 6). Specifically, the CoG model has an additional source of variance due to fluctuating numbers of mitochondria per region, whereas the space-station model has a fixed number of mitochondria at each demand site. In the CoG model, replenishment of protein content occurs in whole-mitochondrion chunks, with transient periods of missing mitochondria in the region until a new one arrives to take its place. This discreteness in protein turnover becomes more pronounced when there are fewer mitochondria per region, as seen in Fig. 6. For the SS model, variability arises from how often motile mitochondria exchange their protein contents with stationary ones, and becomes particularly high when the number of motile mitochondria is small (high  $f_s$ ). Because the protein levels are a continuous quantity, the SS model allows for more extensive equilibration across the many mitochondria in the system, and thus exhibits lower fluctuations than the CoG model. This difference between the models becomes even more pronounced at lower decay rates (S3a Fig), when most mitochondria in the SS system have similarly high protein levels but the fluctuations in mitochondria number for the CoG model are still present. It should be noted that while the SS model in our simulations fills up demand sites with stationary mitochondria uniformly (same  $S$  for all sites), we have also considered an alternate approach where the permanently stationed mitochondria are initially distributed onto demand sites at random. This random initial distribution does not significantly affect the variability in mitochondrial health at the demand sites (S3b Fig).

Overall, the SS model maintains more stable health levels in individual demand sites by allowing for equilibration in protein content rather than removal of discrete

mitochondria. This maintenance system is thus expected to be more robust during periods of consistent metabolic demand in specific regions. By contrast, the CoG maintenance mechanism gives rise to higher variability that could allow for more rapid redistribution of healthy mitochondria in systems with time-varying demand site positions.

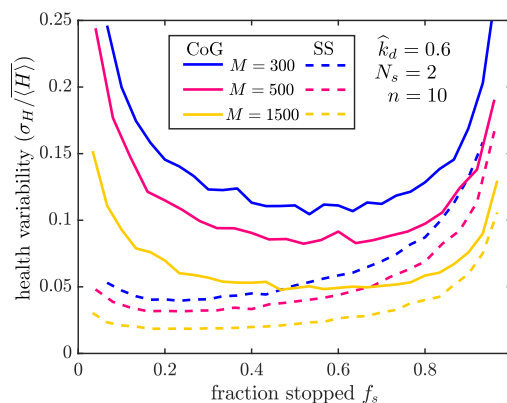

**Fig 6.** Variability of mitochondrial health in different maintenance models. Plotted is the standard deviation in health per region ( $\sigma_H$ ) divided by its average value ( $\langle H \rangle$ ), across 1000 iterations of stochastic simulations. Results are shown for 300 (blue), 500 (magenta), and 1500 (yellow) average mitochondria in the domain. Solid lines correspond to simulations of the CoG model and dashed lines to the SS model. All simulations used parameters  $\hat{k}_d = 0.6$ ,  $n = 10$ ,  $N_s = 2$ . Corresponding plots are provided in Supporting Information to show the effect of lower decay rates (S3a Fig) and of random stationary mitochondria distribution in the SS model (S3b Fig).

## Effect of Mitophagy

In addition to utilizing motor-driven transport and transient fusion events to maintain a healthy mitochondrial population, neuronal cells make use of mitophagy – a quality control pathway for selectively recycling damaged or depleted mitochondria. Mitochondria with low membrane potential are recognized by the PINK1/Parkin signaling pathway, which triggers ubiquitination and arrest of mitochondrial transport [30, 40, 64]. The marked mitochondria are then targeted for encapsulation by autophagosomes, which transport them back to the soma for recycling while fusing with proximally located fully acidified lysosomes en route [50, 56]. In essence, this pathway allows for the selective removal of damaged mitochondria from the population and directed transport back to the cell body for rapid recycling of the mitochondrial building blocks.

We introduce mitophagy into our model by allowing mitochondria to enter an “engulfed” state whenever their health drops below a threshold level ( $\phi$ ). This simplified approach neglects any delays in autophagosome arrival or recognition of the damaged mitochondria, assuming that all engulfment events occur immediately when the threshold is reached. Although a variety of other quality control mechanisms, such as asymmetric fission [65] and health-dependent halting of mitochondrial transport [66], may contribute to mitochondrial homeostasis, we focus here on a single simplified sensing process representing mitophagy.

While in the engulfed state, the mitochondria move exclusively in the retrograde direction [58, 59], without pauses or reversals, and are unable to stop or engage in fusion at the demand sites. For the Space Station model, if a permanently stationary



mitochondrion becomes engulfed and departs for the soma, it leaves behind a gap at the demand site that is filled by stopping the next motile mitochondrion passing that site. A more complex response involving a stopping probability upon passing each open site would correspond to an interpolation between the SS and the CoG models. Because mitophagy is triggered by low health in an individual discrete mitochondrion, our mitophagy model cannot be easily described by mean-field analytical calculations. Instead, we employ stochastic simulations to explore the effect of mitophagy on steady-state mitochondrial maintenance.

## Limiting mitochondrial production rates

In its simplest form, the mitophagy model increases mitochondrial turnover without changing any other parameters. By providing an additional pathway for mitochondria to return to the soma, without altering the production rate  $k_p$ , mitophagy will decrease the total number of mitochondria in the domain (Fig. 7a). This model represents the limiting case where the number of mitochondria in an axon is limited by the rate at which they can be produced from the somal population and injected into the proximal axon, regardless of how much total mitochondrial material is available. We consider the effect of mitophagy on the overall health of axonal mitochondria in this regime, comparing both the SS and CoG model. We start with the case of no mitophagy ( $\phi = 0$ ), considering a vertical slice of the plots in Fig. 5 corresponding to a fraction of mitochondria in the stationary state:  $f_s(\phi = 0) = 0.53$ . We proceed to increase the protein threshold  $\phi$ , corresponding to more frequent mitophagy events, while holding constant all other parameters (including production rate  $k_p$ , number of stops  $N_s$ , restarting rate  $k_w$  in the CoG model, and maximum number of mitochondria that can be stationed at each site,  $S$ , for the SS model). The effect of increasing mitophagy on mitochondrial health can be considered by defining the health in each demand site, normalized by the total mitochondrial content per site in the absence of mitophagy ( $M^{(0)}$ ). Specifically, we define the health of the  $i^{\text{th}}$  demand site as

$$\hat{H}_i^{(0)} = H_i / [M^{(0)} / n], \quad (7)$$

and the average health across all sites as  $\langle \hat{H}^{(0)} \rangle$ . Unlike our previous normalization (Eq. 1), this quantity no longer corresponds to the health per mitochondrion, because the advent of mitophagy would decrease the total number of mitochondria in the domain. Instead, we use this health metric to understand how the total amount of mitochondrial protein changes at each demand site when new mitochondrial production is not upregulated to keep up with the enhanced turnover due to mitophagy. The opposite case, where mitochondrial content is kept constant, is considered in the subsequent section.

As seen in Fig. 7b,c, the introduction of mitophagy in the CoG model decreases the mitochondrial health at the demand sites. This is a result of a decrease in the average number of mitochondria stationed at each site (Fig. 7a), as mitophagy causes more mitochondria to leave the domain without increasing the production rate  $k_p$ . By contrast, in the SS model, modest levels of mitophagy will actually increase the average mitochondrial health at the demand sites (Fig. 7d). For this maintenance system, the number of stationary mitochondria does not change significantly for  $\phi \lesssim 0.2$  (see Fig. 7a). However, these low levels of mitophagy remove some of the most unhealthy motile mitochondria from the population capable of fusing, thereby increasing the average health of all the remaining mitochondria in the domain. Notably, a mitophagy threshold of  $\phi \approx 0.2$  optimizes both the average health of stationary mitochondria and the health of the most distal site in the SS model (Fig. 7d-e).

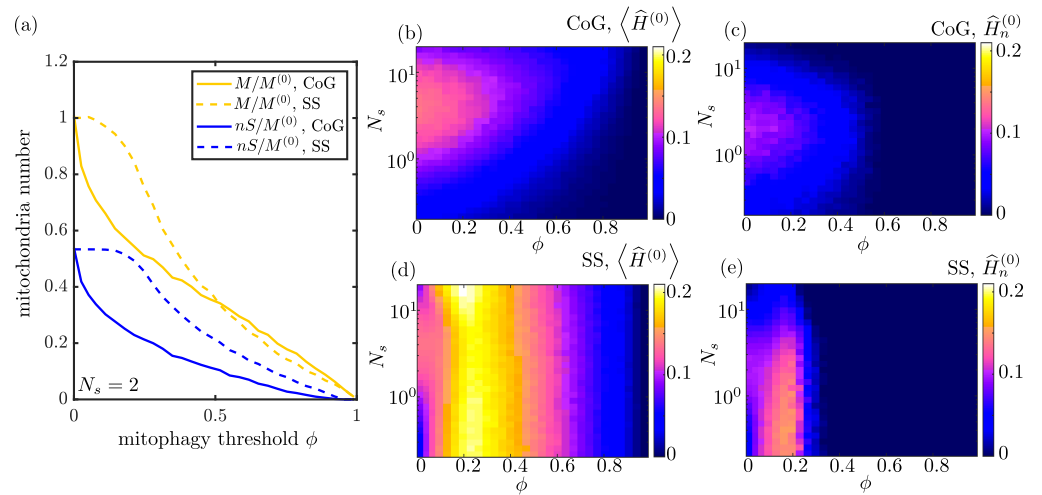

**Fig 7.** Effect of mitophagy, at fixed production rate  $k_p$ . (a) The total number of mitochondria in the domain (yellow) and the number of stationary mitochondria (blue) are plotted as a function of the mitophagy threshold, for both the CoG model (solid lines) and the SS model (dashed lines). Mitochondria quantities are normalized by the steady-state number of mitochondria in the absence of mitophagy. (b) Mitochondrial health for the CoG model, averaged over all demand sites, plotted as a function of mitophagy threshold and number of stopping events  $N_s$ . (c) Health at most distal demand site, for the CoG model. (d-e) Analogous plots of average health and distal site health for the SS model. All plots assume mitochondrial production rate does not change with increased mitophagy, and correspond to fraction of mitochondria stopped  $f_s(\phi = 0) = 0.53$  in the absence of mitophagy.

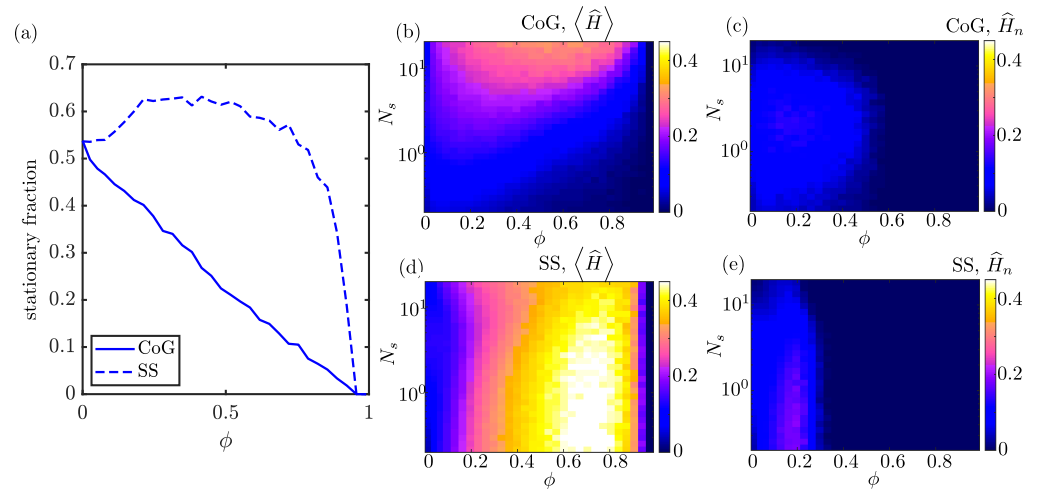

**Fig 8.** Effect of mitophagy when total mitochondrial number is limited. (a) Fraction of mitochondria in the stationary state as a function of increasing mitophagy threshold, for the CoG model (solid line) and the SS model (dashed line), with parameters set such that  $f_s = 0.53$  at  $\phi = 0$ . (b) Mitochondrial health, normalized by the total number of mitochondria per site, averaged over all demand sites, for the CoG model. (c) Normalized mitochondrial health at most distal demand site, for the CoG model. (d-e) Analogous plots of normalized average health and distal site health for the SS model. Normalizing by total mitochondrial number is equivalent to a system where the total mitochondrial content is held fixed with the onset of mitophagy (S4 Fig).

The difference between the CoG and SS model in the presence of mitophagy reflects, in part, the different variability of stationary mitochondria. In the SS model, the mitochondria are more homogeneous in terms of their protein content (Fig. 6). Because mitophagy removes individual organelles whose health drops below a particular threshold, the homogenization arising from fusion events makes it less likely that a stationary mitochondrion will drop below threshold and become engulfed. As a result, low levels of mitophagy have a much smaller effect on both the number of stationary mitochondria and the total number of mitochondria (engulfed, stationary, and motile) in the SS model. For this model, only those mitochondria moving retrograde and already near the somal region become engulfed at low  $\phi$  values. These depleted mitochondria are prevented from fusing with stationary mitochondria in the proximal demand regions, thereby increasing the overall health of the system without substantial change to total mitochondrial number.

### Limiting mitochondrial content

One of the presumed benefits of the mitophagy pathway is its ability to more rapidly return damaged mitochondria to the soma, permitting their components to be recycled for future use [29]. We therefore consider again the regime where the system is limited not directly by the production rate, but by the total amount of available mitochondrial components. In this case, mitophagy causes an increase in the production rate  $k_p$ , as the mitochondria on average return to the soma more quickly for recycling. We implement this model by rescaling all protein levels by the total number of mitochondria (including engulfed, stationary, and motile) in the domain. Health levels are normalized by the actual number of total mitochondria at steady state [ $\hat{H}_i = H_i/(M/n)$ ], thereby removing the effect of decreased mitochondrial population in the presence of autophagy. This approach is equivalent to explicitly fixing the total amount of mitochondrial

content available, as demonstrated in Supplemental Information S4 Fig. 552

In this regime, both the SS and CoG maintenance models allow an increase in 553  
mitochondrial health with intermediate levels of mitophagy (Fig. 8b-e). The normalized 554  
health of the most distal region ( $\hat{H}_n$ ) is increased by about 90% for the SS model and 555  
40% for the CoG model, when compared to the case of zero mitophagy (evaluated at the 556  
optimum value of  $N_s$  for each  $\phi$  value). As before, the optimal mitophagy threshold is 557  
in the range  $\phi \approx 0.1 - 0.2$  for both models. The average health of stationary 558  
mitochondria improves by 80% for the SS model and 20% for the CoG model at these 559  
optimal mitophagy thresholds. While higher mitophagy levels can improve average 560  
regional health still further, they do so at the expense of a severe drop in the health of 561  
the most distal region, as very few mitochondria are able to reach that region when 562  
mitophagy occurs too early in the domain. 563

Even when normalizing by total mitochondrial content, the SS model has a 564  
significant advantage over the CoG model. Namely, because the restarting rate  $k_w$  is 565  
fixed for each row in the plots of Fig. 8, the fraction of mitochondria in the stationary 566  
state drops substantially in the CoG model as mitophagy is introduced (Fig. 8a). This 567  
reflects the fact that stationary mitochondria are preferentially engulfed in this model, 568  
so that even if we normalize by the total mitochondrial content, fewer mitochondria 569  
remain at the demand sites. In the SS model, by contrast, equalization of mitochondrial 570  
health by transient fusion events implies that stationary mitochondria are no more likely 571  
than motile ones to become engulfed, and the fraction of mitochondria in the stationary 572  
state remains constant or even increases slightly for a broad range of  $\phi$  values. 573

An alternate comparison of the two models allows both to adjust all maintenance 574  
parameters freely, comparing the optimal mitochondrial health that can be achieved at 575  
any given mitophagy threshold  $\phi$ . As shown in Fig. 9a, the increase in average health 576  
over all the demand regions can be substantial — up to 4-fold for the CoG model and 577  
5-fold for the SS model. However, the parameters that give such high average health 578  
result in most of the protein content being concentrated in the first few demand sites, 579  
with the health of the most distal site dropping to zero. This regime corresponds to 580  
rapid turnover of motile mitochondria that undergo mitophagy before they ever reach 581  
the distal regions. 582

It should be noted that for both the CoG and the SS model, substantial levels of 583  
mitophagy will result in a spatially uneven mitochondrial distribution, with a decreased 584  
population of mitochondria surviving to reach the distal tip. Interestingly, experimental 585  
observations have also indicated lowered mitochondrial densities at distal sites [67, 68]. 586  
Given the necessity of supplying the metabolic needs of such distal sites, we next 587  
consider the parameters necessary to maximize mitochondrial health in the most distal 588  
demand site, rather than averaging over the entire domain. 589

If we optimize over the health of the most distal site (Fig. 9b), we see as before that 590  
this distal health increases by about 90% in the SS model and about 40% in the CoG 591  
model, compared to the case of no mitophagy. These values represent the maximal 592  
distal site health that can be achieved by each model if all parameters other than  $\phi$ ,  $k_d$ , 593  
 $M$ , and  $n$  are allowed to vary. At the optimal mitophagy threshold ( $\phi \approx 0.2$ ), the 594  
average regional health is also increased, in both models, by up to a factor of two. 595  
However, the CoG model allows for greater average health at still-higher mitophagy 596  
levels, indicative of its tendency to distribute mitochondria unevenly throughout the 597  
domain when mitophagy is present, so that proximal sites gain many healthy 598  
mitochondria while distal health are left undersupplied. 599

We conclude that introducing mitophagy to selectively recycle unhealthy 600  
mitochondria can substantially improve mitochondrial health throughout high-demand 601  
regions of the domain. This improvement is maximized by allowing mitochondria to 602  
become engulfed when their health level drops below approximately 20% of its initial 603

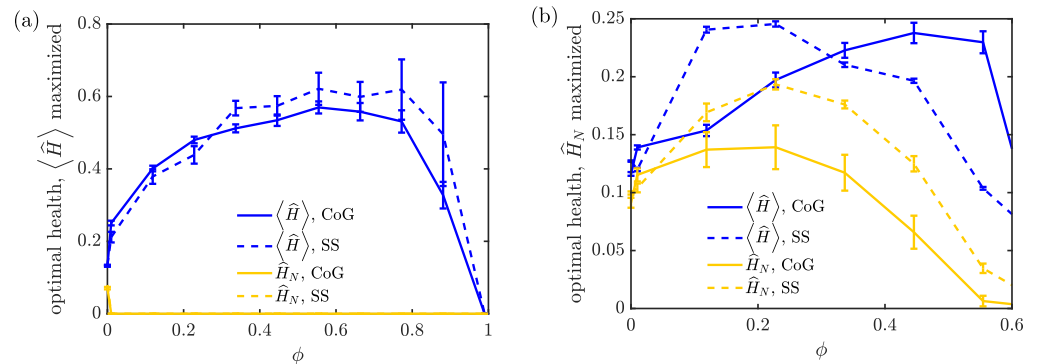

**Fig 9.** Optimal performance of mitochondrial maintenance models in presence of mitophagy. (a) For each mitophagy threshold  $\phi$ , the parameters  $f_s, N_s$  are optimized to give the maximum normalized average health:  $\langle H \rangle$ . The resulting normalized average health (solid lines) and normalized last region health (dashed lines) are plotted for the CoG model (blue) and SS model (yellow). (b) Analogous plots, with parameters adjusted to normalize the normalized last region health  $\hat{H}_n$  for each mitophagy threshold. All health levels are normalized by total mitochondrial content per region ( $M/n$ ), corresponding to a system where the total amount of mitochondrial material is limited. Error bars show SEM. A corresponding plot of optimized health for low decay rate  $\hat{k}_d$  is provided in Supporting Information Fig. S5

value. It should be noted that this optimal value of  $\phi$  is specific to the decay rate ( $\hat{k}_d \approx 0.6$ ) used in these simulations. This dimensionless decay rate corresponds to a domain length of about 10cm and protein lifetime of about 4 days, so that there is a substantial amount of protein decay by the time a mitochondrion traverses the entire domain. Lower values of  $\hat{k}_d$  move the optimal  $\phi$  to higher values, rising to an optimum value of  $\phi = 0.6$  for  $\hat{k}_d = 0.06$ , corresponding to a shorter 1cm axon (S5 Fig). This shift reflects the fact that less degradation occurs during the journey of a mitochondrion along the axon, making it feasible to trigger mitophagy at higher health thresholds while still allowing mitochondria to reach the last demand site. An interesting consequence of this model is that longer neuronal projections require mitophagy to be delayed to more extensive decay levels in order to permit at least partially functional mitochondria to reach the most distant demand sites.

## Discussion

The models described above constitute a quantitative framework for mitochondrial maintenance in extended cellular regions such as neuronal axons. Neurons face unique challenges in mitochondrial homeostasis, both because of the need to transport material from the cell body through long cellular projections and because of their spatially heterogeneous metabolic needs. Balancing these constraints requires positioning stationary mitochondria in specific regions of high metabolic demand, while also retaining a population of motile mitochondria to transport the components needed for mitochondrial health. Our work differs from prior studies of mitochondrial maintenance [51, 52] by taking into account these spatial constraints unique to neurons. At the same time, we diverge from prior models of transport and spatial distribution for neuronal components [35] by incorporating continuous degradation and focusing on the steady-state health at specific localized sites.

Our results highlight similarities and differences between two main models of

mitostasis: the ‘Changing of the Guard’ and the ‘Space Shuttle’ model. In the absence of selective recycling processes, the two models are shown to be equivalent in their average steady-state behavior. Analysis of the mean-field model for both mechanisms shows that in extended projections, with many demand sites and large numbers of mitochondria, the efficiency of the maintenance mechanism depends primarily on three dimensionless parameters. These parameters are (1)  $\hat{k}_d = k_d L/v$ , which sets the extent of health decay while a mitochondrion crosses the domain, (2)  $f_s = nS/M$ , the fraction of mitochondria in the stationary pool, and (3)  $N_s = 2\hat{p}_s n$ , the typical number of stopping events for a mitochondrial component during its round-trip journey through the projection. Optimal mitochondrial health in high-demand sites is achieved at intermediate values of both  $f_s$  and  $N_s$ . The optimal fraction of stationary mitochondria lies in the 50 – 80% range, depending on the precise value of the dimensionless decay rate. This range is compatible with experimental observations which imply that 60 – 90% of axonal mitochondria are stationary [30]. For mature cortical axons, the observed stationary fraction has been observed to be relatively high at 95% [69], possibly hinting at an even slower effective degradation rate of mitochondrial cargo.

Furthermore, our model makes the robust prediction that, for a broad physiologically relevant range of decay rates, very few stopping events ( $N_s \approx 3$ ) are required for optimal maintenance. This result implies that both switching of mitochondria between motile and stationary states and transient fusion events of axonal mitochondria should be very rare – happening only a few times during the entire journey of a mitochondrion down the axon. Due to the inherent difficulty of experimentally tracking motile mitochondria over long time periods, this result is consistent with the fact that stationary mitochondria appear to be nearly permanent and interchange between stationary and motile pools is rarely observed [55, 70, 71].

Differences between the CoG and the SS models become evident when considering the variability of mitochondrial health at demand sites over time and between different cells. Transient fusion and fission events in the SS model allow extensive equilibration of health levels between individual mitochondria, resulting in much lower variance in the health of entire regions. On the one hand, such decreased variance implies a more robust maintenance system, which avoids large fluctuations in metabolic health at a high-demand site as individual mitochondria enter or leave the stationary pool at that site. On the other hand, greater fluctuations in the CoG model may imply an enhanced responsiveness to changing conditions (*eg*: changing spatial distribution of metabolic demand). A close relationship between fluctuation magnitudes and response to external driving is a key feature of physical systems dominated by thermal fluctuations [72]. Analogous fluctuation-response relationships have also been proposed to underly biological systems [73, 74], such as gene networks, where a greater degree of responsiveness to external signals goes hand in hand with higher fluctuations at steady-state [75, 76]. Although detailed exploration of temporal response by mitochondrial maintenance systems lies outside the scope of this paper, the behavior of these models in the presence of time-varying metabolic demand serves as a potentially fruitful area for future work.

A biologically relevant consequence of the different fluctuation magnitudes for the two maintenance models is their differing response to the incorporation of selective mitophagy of damaged mitochondria. In a system where mitochondrial production remains constant, introducing low levels of autophagy causes a substantial drop in the number of stationary mitochondria at each demand site in the CoG model. For the SS model, by contrast, equilibration of mitochondrial health implies that the number of both stationary and total mitochondria remains relatively unchanged at low mitophagy thresholds. As a result, moderate autophagy levels improve the overall mitochondrial health at demand sites in the SS model while monotonically decreasing health in the



CoG case.

Because mitophagy allows mitochondria to be recycled more rapidly, we also consider the steady-state health normalized by total number of mitochondria in the domain. This approach is equivalent to adjusting the mitochondrial production rate in such a way that the total number of mitochondria remains fixed even in the presence of autophagy. In this case, an optimal autophagy threshold is observed for both models, although the SS model still allows for the greatest (nearly 2-fold) increase in the mitochondrial health at the most distal demand site. Overall, the extensive mixing of mitochondrial contents permitted by transient fusion and fission events allows for improved health of localized mitochondria in the presence of recycling via selective mitophagy. The optimal mitophagy threshold depends on the domain length and mitochondrial component decay rate, with an optimal value of  $\phi \approx 0.2$  for both models at the physiologically relevant case of 1 – 10cm axons and 4-day mitochondrial protein decay times.

The models described in this work are, of necessity, highly simplified and designed to highlight the key challenges of mitochondrial maintenance in long neuronal projections and the some of the fundamental strategies that can be utilized by the cell to meet those challenges. In reality, neuronal mitostasis may include a variety of complicating factors, many of which remain poorly understood. For example, our model incorporates the simplest possible sensing and response mechanism for mitochondrial health — dropping below a critical health level prevents further exchange events and forces a return to the soma for recycling. Other contributing mechanisms may include asymmetric fission that concentrates health factors in one of the resulting organelles [52,65], local recycling [56] and formation of new mitochondria, or a sensing mechanism that regulates the ability of mitochondria to stop as a function of total ATP production by other mitochondria in the region [31,77]. Although such mechanisms would allow for more efficient mitochondrial turnover, we focus here on the simplified case of purely somal mitochondria production and no additional sensing that would differentiate the behavior of stationary versus motile organelles. Additionally, we employ the simplifying assumption of a constant decay rate  $k_d$  for both stationary and motile mitochondria. More complicated models where the decay in mitochondrial health depends on local metabolic activity could be incorporated within the framework of this model in future work.

We also neglect the contribution of local protein translation at distal sites, which has been implicated as a potentially important contributor to neuronal homeostasis [3–5]. Although the fraction of mitochondrial proteins that rely on local translation is unknown, roughly 30% of all neuronal mRNA transcripts have been identified outside the cell body [41]. Of these, severed axonal regions are estimated to have a protein synthesis capacity per volume that is a small percentage ( $\sim 10\%$ ) when compared to the cell body [2]. Our assumption that key components of mitochondrial health require long-range transport from the soma is partly substantiated by evidence that mitochondrial aging increases with distance from the soma [61], implying an important role for long-range transport.

We consider the simplest possible system geometry, with a single linear projection rather than more complicated branched axonal structures. This simplification allows the model to focus on the interplay of long-distance transport and mitochondrial interchange, leaving the role of geometric complexity for future study. Our models assume the metabolic demand in a neuron is concentrated at discrete high-demand regions. While this is an over-simplification of the complex distribution of neuronal metabolism, it serves as a limiting case for spatial heterogeneity that requires the formation of both stationary and motile pools of mitochondria.

Studies in non-neural globular animal cells show that mitochondrial maintenance relies largely on fusion and fission to maintain the health of the overall population of

mitochondria [42]. In neuronal axons, fusion events are thought to be relatively rare, and it seems likely that mitostasis actually relies on a hybrid of the ‘Changing-of-the-Guard’ and the ‘Space-Shuttle’ mechanisms. Our separate exploration of the two models highlights the similarity of both in maintaining the average mitochondrial health. However, we have also shown that the differing fluctuations dictated by the two models can alter their response to rising levels of mitophagy, implying that the introduction of occasional localized fission and fusion events can prove beneficial.

The interplay of transport and localization is a general principle for maintaining homeostasis under the constraints of highly extended geometries and spatially heterogeneous demands that characterize neuronal cells. Our analysis outlines the key parameters that can be tuned to optimize steady-state distributions, with a specific focus on maintaining mitochondrial health in neurons. A key consequence of the models is that optimal mitochondrial health can be maintained with a large fraction of stationary mitochondria and with very rare interchange between the stationary and motile population. This prediction may account for the difficulty of catching such exchanges in live cell imaging experiments, and the general tendency of stationary mitochondria to remain stationary over long periods of observation [69–71]. With the advent of new experimental techniques that allow for long-term tracking of individual mitochondria [55], it would be valuable to quantify the frequency of these rare transitions. Our results also predict a benefit to mitochondrial exchange via transient fusion events, motivating future experimental determination of whether such fusions contribute to maintenance of localized axonal mitochondria. Given the importance of mitochondrial maintenance for neuronal health, developing a quantitative framework that delineates the factors governing mitostasis serves as a critical step towards better understanding of the role of metabolism in neurodegenerative diseases.

## Methods

Source code for all simulations and analytic calculations is available at: <https://github.com/lenafabr/mitofusion>.

## Table of Parameters

| Input Parameters             |                                                                                   |                                          |
|------------------------------|-----------------------------------------------------------------------------------|------------------------------------------|
| Symbol                       | Description                                                                       | Value used                               |
| $L$                          | Length of axonal domain                                                           | 1 - 10 cm                                |
| $k_d$                        | Decay rate of mitochondrial protein                                               | $(4\text{days})^{-1}$                    |
| $M$                          | total number of mitochondria in the axonal domain                                 | Variable (depending on length of domain) |
| $n$                          | Demand sites in axonal domain                                                     | Variable                                 |
| $k_p$                        | Production rate of mitochondria at the soma                                       | Variable                                 |
| $v$                          | Speed of mitochondria in an axon                                                  | $0.5 \mu\text{m/s}$                      |
| $k_w$                        | Rate of re-entry of stationary mitochondria to motile pool                        | Variable                                 |
| $p_s$                        | Stopping probability of motile mitochondria at demand sites                       | Variable                                 |
| $p_f$                        | Probability of transient fusion between a motile and stationary mitochondria      | Variable                                 |
| $\phi$                       | Health threshold for mitophagy                                                    | Variable                                 |
| Effective Derived Parameters |                                                                                   |                                          |
| Symbol                       | Description                                                                       | Formula                                  |
| $\rho$                       | Steady-state density of motile mitochondria                                       | $2k_p/v$                                 |
| $S$                          | Steady-state number of stationary mitochondria at each demand site                | $v\rho p_s/k_w$                          |
| $f_s$                        | Fraction of mitochondria in the stationary pool                                   | $\frac{nS}{M}$                           |
| $\hat{k}_w$                  | Effective restarting rate in Space Station model                                  | $\frac{p_s}{2}v$                         |
| $\hat{p}_s$                  | Effective probability of protein stopping at a demand site in Space Station model | $1 - (1 - p_f/2)^S$                      |
| $\hat{k}_d$                  | Non-dimensionalized decay rate                                                    | $k_d L/v$                                |
| $N_s$                        | Number of stopping events during a protein's back and forth journey in the domain | $2\hat{p}_s n$                           |

## Steady-state mean-field solution for CoG model

We find the steady-state solution for the mean-field version of the Changing-of-the-Guard model, which treats mitochondrial density and mitochondrial health as continuous fields on a linear segment from  $x = 0$  to  $x = L$ . We define the density of anterograde and retrograde motile mitochondria as  $\rho^\pm(x)$ , while the number of stationary mitochondria in each point-like high-demand region  $i$  is given by  $S_i$ . These distributions obey the following set of dynamic equations:

$$\frac{d\rho^\pm}{dt} = \mp v \frac{\partial \rho^\pm}{\partial x} \quad (8a)$$

$$\frac{dS_i}{dt} = vp_s(\rho^+(x_i^-) + \rho^-(x_i^+)) - k_w S_i \quad (8b)$$

$$v\rho^\pm(x_i^\pm) = v\rho^\pm(x_i^\mp)(1 - p_s) + \frac{1}{2}k_w S_i \quad (8c)$$

$$\rho^+(L) = \rho^-(L) \quad (8d)$$

$$v\rho^+(0) = k_p \quad (8e)$$

Equation 8a describes the evolution of the mitochondrial density in each interval between consecutive regions of high demand. Equation 8b governs the number of

stopped mitochondria at each discrete demand site, with the first term corresponding to the incoming flux of mitochondria stopping at that site, and the second term corresponding to the restarting of stationary mitochondria. The remaining equations provide the boundary conditions for each interval of the domain between demand sites. Equation 8c enforces conservation of organelles, so that the flux of anterograde mitochondria leaving the site is equal to the combination of those organelles which pass by without stopping and those which restart from a stopped state. Eq. 8d - 8e set the boundary conditions at the proximal end of the domain (mitochondrial production) and at the distal end (anterograde mitochondria turn around to move in the retrograde direction).

At steady state, Eq. 8a implies that the linear density of mitochondria is constant within each region between demand sites. Setting Eq. 8b to zero yields the steady-state relation,

$$S_i = \frac{vp_s(\rho^+(x_i^-) + \rho^-(x_i^+))}{k_w}. \quad (9)$$

Plugging in to the boundary conditions Eq. 8c-8e then implies that the motile mitochondrial densities are equal and constant everywhere in the domain:  $\rho^+ = \rho^-$ . We define  $\rho = \rho^+ + \rho^-$  as the constant steady-state density of all motile mitochondria. From the boundary condition at the proximal end, we can relate this density (as well as the stopped mitochondria at each site) to the rate of mitochondrial production.

$$\rho = 2k_p/v, \quad S = vp_s\rho/k_w$$

The linear density of mitochondrial health (ie: the sum of health levels for all mitochondria that happen to be present at a given position in the domain) can be described by very similar equations, with additional terms for decay at rate  $k_d$ . Equation 2 describes the evolution of this field over time.

Setting Eq. 2b- 2c to zero at steady-state yields the relations

$$vH^+(x_i^+) = vH^+(x_i^-)(1 - p_s) + \frac{k_w vp_s [H^+(x_i^-) + H^-(x_i^+)]}{2(k_d + k_w)}. \quad (10)$$

Furthermore, Eq. 2a implies that the steady-state distribution of motile mitochondrial health exhibits an exponential decay across each interval between consecutive demand sites  $i - 1$  and  $i$ . This gives the set of conditions:

$$H^+(x_i^-) = e^{-xk_d/v} H^+(x_{i-1}^+), \quad H^-(x_{i-1}^+) = e^{xk_d/v} H^-(x_i^-), \quad (11)$$

Together, Eq. 10, 11, and 2c - 2e constitute a set of linear equations for the health levels in stationary mitochondria at the demand sites  $[H_i]$  and the motile health densities on either edge of the demand sites  $[H^\pm(x_i^\pm)]$ . This system of equations is then solved using standard matrix methods.

## Steady-state mean field solution for SS model

A key feature of the Space Shuttle model is that a fixed number of permanently immobile mitochondria ( $S$ ) are stationed at each discrete demand site. These mitochondria are assumed to have a well defined order, but to be positioned arbitrarily close together within the point-like site. We define  $H_{i,j}$  (with  $1 \leq i \leq n$  and  $1 \leq j \leq S$ ) as the health of the  $j^{\text{th}}$  stationary mitochondrion at the  $i^{\text{th}}$  demand site. An anterograde moving mitochondrion encounters each of the stationary ones in order as it passes the demand site. The quantity  $H_{i,j-1}^+$  describes the linear health density of all anterograde mitochondria just after they pass the  $(j - 1)^{\text{th}}$  stationary organelle at the

$i^{\text{th}}$  site, and are approaching the  $j^{\text{th}}$  stationary organelle. Similarly, retrograde mitochondria encounter the stationary organelles in reverse order and their health density is given by  $H_{i,j+1}^-$  as they approach the  $j^{\text{th}}$  stationary organelle from the distal side. Each time a moving mitochondrion passes a stationary one, there is a probability  $p_f$  that they will fuse. When such a fusion event occurs, the health levels of the two mitochondria are averaged together and both are left with a health equal to that average. It should be noted that  $H^\pm$  and  $H_{i,j}^\pm$  are densities and have units of health level per unit length, while the quantities  $H_{ij}$  have units of health level.

Motile anterograde mitochondria are produced at the proximal end with rate  $k_p$ . They then move forward and back throughout the domain, never stopping and instantaneously reversing their direction from anterograde to retrograde once they reach the distal end. The density of motile mitochondria is not affected by the fusion behavior, and evolves according to Equations 8a, 8d, 8e. At steady state, this density must be a constant value  $\rho = (M - nS)/L$ , equally split between anterograde and retrograde organelles.

The set of mean-field equations describing the mitochondrial health in the SS model is, for  $1 \leq j \leq S$ ,

$$\frac{dH^\pm}{dt} = \mp v \frac{\partial H^\pm}{\partial x} - k_d H^\pm \quad (12a)$$

$$\frac{dH_{i,j}}{dt} = \frac{vp_f}{2} [H_{i,j-1}^+ + H_{i,j+1}^-] - \left[ \frac{v\rho p_f}{2} + k_d \right] H_{i,j} \quad (12b)$$

$$vH_{i,j}^\pm = vH_{i,j\mp 1}^\pm \left( 1 - \frac{p_f}{2} \right) + \frac{p_f}{2} H_{i,j} \quad (12c)$$

$$H^+(L) = H^-(L) \quad (12d)$$

$$vH^+(0) = k_p. \quad (12e)$$

Equation 12b describes the time evolution of the health of each stationary mitochondrion. The first term corresponds to the flux of incoming mitochondrial health multiplied by the probability of fusion ( $p_f$ ) and the probability (1/2) that a given protein (or other health marker) will stay with the stationary mitochondria after the fusion-and-fission cycle is complete. The second term gives the rate at which health markers leave the stationary mitochondrion through being transferred to the motile partner during a fission and fusion cycle, and through decay. The edge values at each site are defined by  $H_{i,0}^+ = H^+(x_i^-)$ ,  $H_{i,S}^+ = H^+(x_i^+)$ ,  $H_{i,1}^- = H^-(x_i^-)$ , and  $H_{i,S+1}^- = H^-(x_i^+)$ . Equation 12c sets the flux of anterograde-moving health leaving a stationary mitochondrion on the distal side equal to the flux of anterograde health approaching that mitochondrion and going straight through without transfer via fusion plus the flux of health markers carried out of the stationary mitochondria as a result of fusion events. A similar condition holds for the health density of retrograde-moving mitochondria. Overall, Eq. 12 provides a closed set of equations that can be solved at steady state.

In the case where there is one stationary mitochondrion at each demand site ( $S = 1$ ), the equations above become equivalent to the dynamic equations for the CoG model (Eq. 2), with the restarting rate  $k_w$  replaced by an effective rate at which proteins in a stationary mitochondrion leave the organelle via fusion and fission ( $\hat{k}_w = v\rho p_f/2$ ). The stopping rate  $p_s$  is replaced by an effective rate of a protein ending up in a stationary mitochondrion each time there is a passage event ( $\hat{p}_s = p_f/2$ ). In the case where there is multiple mitochondria per site, the total stationary health at each site is given by

$H_i = \sum_{j=1}^S H_{i,j}$ . Solving together Equations 12b- 12c then yields

$$\begin{aligned} \frac{dH_i}{dt} = v \left[ 1 - \left( 1 - \frac{p_f}{2} \right)^S \right] [H^+(x_i^-) + H^-(x_i^+)] - \left[ \frac{v p p_f}{2} + k_d \right] H_{i,j} \\ + \frac{p_f}{2} \sum_{k=1}^S \left[ 1 - \left( 1 - \frac{p_f}{2} \right)^{S-k} \right] (H_{i,k} + H_{i,S-k+1}). \end{aligned} \quad (13)$$

For small values of  $p_f$ , the last term can be neglected, and the SS model becomes equivalent to the CoG model (Eq. 2b), with the effective stopping rate given by  $\hat{p}_s = 1 - (1 - p_f/2)^S$ , and the effective restarting rate given by Eq. 5. Intuitively, the effective stopping rate is simply obtained by finding one minus the probability that a protein is not left behind in any of the  $S$  independent fusion events, each of which occurs with probability  $p_f$  while passing the multiple mitochondria stationed at a site.

## Discrete stochastic simulations

Discrete stochastic simulations for both the CoG and the SS model were carried out by tracking the positions and health levels of individual point-like mitochondria on a finite linear interval representing a neuronal axon. All length units were normalized by the domain length and all time units by the mitochondrial velocity, such that  $L = 1$  and  $v = 1$  in the simulations. High-demand sites where mitochondria could stop (in the CoG model) or fuse (in the SS model) were represented as point sites equispaced in the domain. Simulations were propagated forward for  $10^5$  time-steps of duration  $\Delta t = 10^{-3}$ . Each simulation was carried out as 100 independent iterations and the average results are reported.

At each time-step, a new mitochondrion was generated at position 0 with probability  $1 - \exp(-k_p \Delta t)$ . For the CoG model, each mitochondrion was labeled as being in the anterograde, retrograde, or stationary state. At each time-step, a motile mitochondrion took a step of  $\pm v \Delta t$ , depending on whether it was in the anterograde or retrograde step. An anterograde mitochondrion that reached the domain end (at  $L$ ) was flipped to a retrograde state. A retrograde mitochondrion that reached 0 was removed from the simulation. A stationary mitochondrion restarted with probability  $1 - \exp(-k_w \Delta t)$ , with its new directionality equally likely to be set to anterograde or retrograde. Whenever a motile mitochondrion crossed the demand site, it had probability  $p_s$  of switching to a stationary state. Each mitochondrion had a continuous health variable associated with it, set to 1 when the mitochondrion was formed and multiplied by  $\exp(-k_d \Delta t)$  during each simulation time-step.

The SS model was simulated in a similar manner. A fixed number of permanently stationary mitochondria were evenly distributed among the demand sites at the beginning of the simulation. Each time a motile mitochondrion crossed over the demand site, it attempted to fuse with each stationary mitochondrion at that site, in sequence, with probability  $p_f$ . Whenever a fusion successfully occurred, the health levels of both fusing mitochondria were set to the average of their two health levels. The motile mitochondrion would then proceed to attempt the next fusion or move further down the domain. Fission and fusion events were assumed to be instantaneous.

Mitophagy in the stochastic simulations was implemented by setting a cutoff level  $\phi$  for the health of an individual mitochondrion. Whenever a mitochondrion's health dropped below that cutoff, it was labeled as "engulfed". An engulfed mitochondrion moved in the retrograde direction ( $-v \Delta t$ ) on each time-step, but was not subject to fusion, fission, or stopping events. Once it reached the proximal end of the domain (position 0) it was removed from the simulation. The total number of mitochondria in the domain ( $M$ ) included these engulfed particles. However, their health levels were not



included in any calculations of health at the demand sites. Simulations with mitophagy (Fig. 7, 8, 9) were carried out with  $M = 300$ .

For S4 Fig, additional stochastic simulations were carried out for a variant of the CoG model with explicitly fixed total number of mitochondria in the domain. Specifically,  $M$  mitochondria were initially placed uniformly at random in the domain in a motile state. Each time a retrograde mitochondrion reached  $x = 0$ , it switched immediately into an anterograde mitochondrion with health level reset to 1. No new mitochondria were produced, and the system was allowed to run for  $10^5$  time-steps to reach steady-state. The number of mitochondria therefore stayed fixed throughout, regardless of the presence of mitophagy.

## Optimizing performance in the presence of mitophagy

For each of the plots showing the effect of mitophagy in Fig. 7, 8, the effective stopping rate was set to give a particular value of  $N_s$ . Simulations were carried out with  $n = 10$  demand sites, and  $M = 300$  average total mitochondria in the domain.

For the data shown in Fig. 7, 8, the fraction of stopped mitochondria was set to  $f_s(\phi = 0) = 0.53$  in the absence of mitophagy. In the SS model, a number  $f_s M$  of permanently stationary mitochondria were placed evenly distributed among all the demand sites. In the CoG model, the restarting rate  $k_w$  was set according to Eq. 4, for each value of  $N_s$ . The production rate was then set according to Eq. 3, to give the desired number of motile mitochondria in the domain at steady-state. The value of  $k_p$  was not changed as the mitophagy cutoff increased, so that higher mitophagy in Fig. 7 corresponds to fewer total mitochondria in the domain.

In Fig. 8, the value of  $k_p$  was also kept constant, but the resulting health levels were normalized by the total actual number of mitochondria in the domain. Because properly normalized health levels are not sensitive to the absolute number of mitochondria, this procedure was equivalent to explicitly fixing the total number of mitochondria. A direct comparison for the CoG model with explicitly fixed  $M$  is provided in Supplemental Material.

Optimization of normalized health over all parameters (Fig. 9) was carried out by running simulations with 100 independent iterations each for a  $10 \times 10$  grid of  $N_s$  and  $f_s$  values, for each mitophagy cutoff  $\phi$ . The normalized average health and normalized last region health was computed for each set of parameter values, and the maximum of each for a given  $\phi$  was found.

## Acknowledgements

We thank Aidan Brown and Gulcin Pekkurnaz for helpful discussions.

## Funding Sources

Funding for this work was provided by the National Science Foundation CAREER Award (#1848057) and by the Hellman Fellows Fund.

## References

1. González C, Couve A. The axonal endoplasmic reticulum and protein trafficking: Cellular bootlegging south of the soma. In: Seminars in cell & developmental biology. vol. 27. Elsevier; 2014. p. 23–31.

2. Lee SK, Hollenbeck PJ. Organization and translation of mRNA in sympathetic axons. *Journal of Cell Science*. 2003;116(21):4467–4478.
3. Kaplan BB, Gioio AE, Hillefors M, Aschrafi A. Axonal protein synthesis and the regulation of local mitochondrial function. In: *Cell biology of the axon*. Springer; 2009. p. 1–25.
4. Jung H, Yoon BC, Holt CE. Axonal mRNA localization and local protein synthesis in nervous system assembly, maintenance and repair. *Nature Reviews Neuroscience*. 2012;13(5):308–324.
5. Holt CE, Schuman EM. The central dogma decentralized: new perspectives on RNA function and local translation in neurons. *Neuron*. 2013;80(3):648–657.
6. Costa CJ, Willis DE. To the end of the line: axonal mRNA transport and local translation in health and neurodegenerative disease. *Developmental neurobiology*. 2018;78(3):209–220.
7. Sahoo PK, Smith DS, Perrone-Bizzozero N, Twiss JL. Axonal mRNA transport and translation at a glance. *Journal of cell science*. 2018;131(8).
8. Turner-Bridger B, Jakobs M, Muresan L, Wong HHW, Franze K, Harris WA, et al. Single-molecule analysis of endogenous  $\beta$ -actin mRNA trafficking reveals a mechanism for compartmentalized mRNA localization in axons. *Proceedings of the National Academy of Sciences*. 2018;115(41):E9697–E9706.
9. Zhou B, Yu P, Lin MY, Sun T, Chen Y, Sheng ZH. Facilitation of axon regeneration by enhancing mitochondrial transport and rescuing energy deficits. *J Cell Biol*. 2016;214(1):103–119.
10. Bradke F, Fawcett JW, Spira ME. Assembly of a new growth cone after axotomy: the precursor to axon regeneration. *Nature Reviews Neuroscience*. 2012;13(3):183–193.
11. Mar FM, Simões AR, Leite S, Morgado MM, Santos TE, Rodrigo IS, et al. CNS axons globally increase axonal transport after peripheral conditioning. *Journal of Neuroscience*. 2014;34(17):5965–5970.
12. Goldstein AY, Wang X, Schwarz TL. Axonal transport and the delivery of pre-synaptic components. *Current opinion in neurobiology*. 2008;18(5):495–503.
13. Lipton DM, Maeder CI, Shen K. Rapid assembly of presynaptic materials behind the growth cone in dopaminergic neurons is mediated by precise regulation of axonal transport. *Cell reports*. 2018;24(10):2709–2722.
14. Guedes-Dias P, Holzbaur EL. Axonal transport: Driving synaptic function. *Science*. 2019;366(6462):eaaw9997.
15. Doyle M, Kiebler MA. Mechanisms of dendritic mRNA transport and its role in synaptic tagging. *The EMBO journal*. 2011;30(17):3540–3552.
16. Zhao J, Fok AHK, Fan R, Kwan PY, Chan HL, Lo LHY, et al. Specific depletion of the motor protein KIF5B leads to deficits in dendritic transport, synaptic plasticity and memory. *Elife*. 2020;9:e53456.
17. Burow DA, Umeh-Garcia MC, True MB, Bakhaj CD, Ardell DH, Cleary MD. Dynamic regulation of mRNA decay during neural development. *Neural development*. 2015;10(1):11.

18. Dörrbaum AR, Kochen L, Langer JD, Schuman EM. Local and global influences on protein turnover in neurons and glia. *Elife*. 2018;7:e34202.
19. Harris JJ, Jolivet R, Attwell D. Synaptic energy use and supply. *Neuron*. 2012;75(5):762–777.
20. Rangaraju V, Calloway N, Ryan TA. Activity-driven local ATP synthesis is required for synaptic function. *Cell*. 2014;156(4):825–835.
21. Ibrahim M, Butt A, Berry M. Relationship between myelin sheath diameter and internodal length in axons of the anterior medullary velum of the adult rat. *Journal of the neurological sciences*. 1995;133(1-2):119–127.
22. Chiu SY. Matching mitochondria to metabolic needs at nodes of Ranvier. *The Neuroscientist*. 2011;17(4):343–350.
23. Rangaraju V, Lauterbach M, Schuman EM. Spatially stable mitochondrial compartments fuel local translation during plasticity. *Cell*. 2019;176(1-2):73–84.
24. Harris JJ, Attwell D. The energetics of CNS white matter. *J Neurosci*. 2012;32(1):356–371.
25. Sheng ZH. Mitochondrial trafficking and anchoring in neurons: new insight and implications. *J Cell Biol*. 2014;204(7):1087–1098.
26. Zhang CL, Ho PL, Kintner DB, Sun D, Chiu SY. Activity-dependent regulation of mitochondrial motility by calcium and Na/K-ATPase at nodes of Ranvier of myelinated nerves. *Journal of Neuroscience*. 2010;30(10):3555–3566.
27. Ohno N, Kidd GJ, Mahad D, Kiryu-Seo S, Avishai A, Komuro H, et al. Myelination and axonal electrical activity modulate the distribution and motility of mitochondria at CNS nodes of Ranvier. *Journal of Neuroscience*. 2011;31(20):7249–7258.
28. Davis AF, Clayton DA. In situ localization of mitochondrial DNA replication in intact mammalian cells. *The Journal of cell biology*. 1996;135(4):883–893.
29. Misgeld T, Schwarz TL. Mitostasis in neurons: maintaining mitochondria in an extended cellular architecture. *Neuron*. 2017;96(3):651–666.
30. Schwarz TL. Mitochondrial trafficking in neurons. *Cold Spring Harbor perspectives in biology*. 2013;5(6):a011304.
31. Wang X, Schwarz TL. The mechanism of Ca<sup>2+</sup>-dependent regulation of kinesin-mediated mitochondrial motility. *Cell*. 2009;136(1):163–174.
32. Pekkurnaz G, Trinidad JC, Wang X, Kong D, Schwarz TL. Glucose regulates mitochondrial motility via Milton modification by O-GlcNAc transferase. *Cell*. 2014;158(1):54–68.
33. Kang JS, Tian JH, Pan PY, Zald P, Li C, Deng C, et al. Docking of axonal mitochondria by syntaphilin controls their mobility and affects short-term facilitation. *Cell*. 2008;132(1):137–148.
34. Wong MY, Zhou C, Shakiryanova D, Lloyd TE, Deitcher DL, Levitan ES. Neuropeptide delivery to synapses by long-range vesicle circulation and sporadic capture. *Cell*. 2012;148(5):1029–1038.

35. Williams AH, O'donnell C, Sejnowski TJ, O'leary T. Dendritic trafficking faces physiologically critical speed-precision tradeoffs. *Elife*. 2016;5:e20556.
36. Nicholls DG. Mitochondrial membrane potential and aging. *Aging cell*. 2004;3(1):35–40.
37. Balaban RS, Nemoto S, Finkel T. Mitochondria, oxidants, and aging. *cell*. 2005;120(4):483–495.
38. Sheng ZH, Cai Q. Mitochondrial transport in neurons: impact on synaptic homeostasis and neurodegeneration. *Nature Reviews Neuroscience*. 2012;13(2):77–93.
39. Itoh K, Nakamura K, Iijima M, Sesaki H. Mitochondrial dynamics in neurodegeneration. *Trends in cell biology*. 2013;23(2):64–71.
40. Vincow ES, Merrihew G, Thomas RE, Shulman NJ, Beyer RP, MacCoss MJ, et al. The PINK1–Parkin pathway promotes both mitophagy and selective respiratory chain turnover in vivo. *Proceedings of the National Academy of Sciences*. 2013;110(16):6400–6405.
41. Cajigas IJ, Tushev G, Will TJ, tom Dieck S, Fuerst N, Schuman EM. The local transcriptome in the synaptic neuropil revealed by deep sequencing and high-resolution imaging. *Neuron*. 2012;74(3):453–466.
42. Westermann B. Mitochondrial fusion and fission in cell life and death. *Nature reviews Molecular cell biology*. 2010;11(12):872–884.
43. Wang S, Xiao W, Shan S, Jiang C, Chen M, Zhang Y, et al. Multi-patterned dynamics of mitochondrial fission and fusion in a living cell. *PloS one*. 2012;7(5):e19879.
44. Cagalinec M, Safiulina D, Liiv M, Liiv J, Choubey V, Wareski P, et al. Principles of the mitochondrial fusion and fission cycle in neurons. *Journal of cell science*. 2013;126(10):2187–2197.
45. Hoitzing H, Johnston IG, Jones NS. What is the function of mitochondrial networks? A theoretical assessment of hypotheses and proposal for future research. *Bioessays*. 2015;37(6):687–700.
46. Viana MP, Brown AI, Mueller IA, Goul C, Koslover EF, Rafelski SM. Mitochondrial fission and fusion dynamics generate efficient, robust, and evenly distributed network topologies in budding yeast cells. *Cell systems*. 2020;.
47. Liu X, Weaver D, Shirihai O, Hajnóczky G. Mitochondrial ‘kiss-and-run’: interplay between mitochondrial motility and fusion–fission dynamics. *The EMBO journal*. 2009;28(20):3074–3089.
48. Seager R, Lee L, Henley JM, Wilkinson KA. Mechanisms and roles of mitochondrial localisation and dynamics in neuronal function. *Neuronal Signaling*. 2020;4(2).
49. Youle RJ, Narendra DP. Mechanisms of mitophagy. *Nature reviews Molecular cell biology*. 2011;12(1):9–14.
50. Maday S, Wallace KE, Holzbaur EL. Autophagosomes initiate distally and mature during transport toward the cell soma in primary neurons. *Journal of Cell Biology*. 2012;196(4):407–417.

51. Mouli PK, Twig G, Shirihai OS. Frequency and selectivity of mitochondrial fusion are key to its quality maintenance function. *Biophysical journal*. 2009;96(9):3509–3518.
52. Patel PK, Shirihai O, Huang KC. Optimal dynamics for quality control in spatially distributed mitochondrial networks. *PLoS Comput Biol*. 2013;9(7):e1003108.
53. Figure generated with the aid of Servier Medical Art, licensed under a Creative Commons Attribution 3.0 Generic License. <http://smart.servier.com/>;
54. Kim Y, Zheng X, Ansari Z, Bunnell MC, Herdy JR, Traxler L, et al. Mitochondrial aging defects emerge in directly reprogrammed human neurons due to their metabolic profile. *Cell reports*. 2018;23(9):2550–2558.
55. Wehnekamp F, Plucińska G, Thong R, Misgeld T, Lamb DC. Nanoresolution real-time 3D orbital tracking for studying mitochondrial trafficking in vertebrate axons in vivo. *Elife*. 2019;8:e46059.
56. Ashrafi G, Schlehe JS, LaVoie MJ, Schwarz TL. Mitophagy of damaged mitochondria occurs locally in distal neuronal axons and requires PINK1 and Parkin. *Journal of Cell Biology*. 2014;206(5):655–670.
57. Mandal A, Wong HTC, Pinter K, Mosqueda N, Beirl A, Lomash RM, et al. Retrograde mitochondrial transport is essential for organelle distribution and health in zebrafish neurons. *Journal of Neuroscience*. 2020;
58. Miller KE, Sheetz MP. Axonal mitochondrial transport and potential are correlated. *Journal of cell science*. 2004;117(13):2791–2804.
59. Cai Q, Zakaria HM, Simone A, Sheng ZH. Spatial parkin translocation and degradation of damaged mitochondria via mitophagy in live cortical neurons. *Current Biology*. 2012;22(6):545–552.
60. Plucińska G, Paquet D, Hruscha A, Godinho L, Haass C, Schmid B, et al. In vivo imaging of disease-related mitochondrial dynamics in a vertebrate model system. *Journal of Neuroscience*. 2012;32(46):16203–16212.
61. Ferree AW, Trudeau K, Zik E, Benador IY, Twig G, Gottlieb RA, et al. MitoTimer probe reveals the impact of autophagy, fusion, and motility on subcellular distribution of young and old mitochondrial protein and on relative mitochondrial protein age. *Autophagy*. 2013;9(11):1887–1896.
62. Saxton WM, Hollenbeck PJ. The axonal transport of mitochondria. *J Cell Sci*. 2012;125(9):2095–2104.
63. Caminiti R, Carducci F, Piervincenzi C, Battaglia-Mayer A, Confalone G, Visco-Comandini F, et al. Diameter, length, speed, and conduction delay of callosal axons in macaque monkeys and humans: comparing data from histology and magnetic resonance imaging diffusion tractography. *Journal of Neuroscience*. 2013;33(36):14501–14511.
64. Wang X, Winter D, Ashrafi G, Schlehe J, Wong YL, Selkoe D, et al. PINK1 and Parkin target Miro for phosphorylation and degradation to arrest mitochondrial motility. *Cell*. 2011;147(4):893–906.

65. Twig G, Elorza A, Molina AJ, Mohamed H, Wikstrom JD, Walzer G, et al. Fission and selective fusion govern mitochondrial segregation and elimination by autophagy. *The EMBO journal*. 2008;27(2):433–446.
66. Zheng YR, Zhang XN, Chen Z. Mitochondrial transport serves as a mitochondrial quality control strategy in axons: Implications for central nervous system disorders. *CNS Neuroscience & Therapeutics*. 2019;25(7):876–886.
67. Magrané J, Sahawneh MA, Przedborski S, Estévez ÁG, Manfredi G. Mitochondrial dynamics and bioenergetic dysfunction is associated with synaptic alterations in mutant SOD1 motor neurons. *Journal of Neuroscience*. 2012;32(1):229–242.
68. Niescier RF, Kwak SK, Joo SH, Chang KT, Min KT. Dynamics of mitochondrial transport in axons. *Frontiers in cellular neuroscience*. 2016;10:123.
69. Lewis Jr TL, Turi GF, Kwon SK, Losonczy A, Polleux F. Progressive decrease of mitochondrial motility during maturation of cortical axons in vitro and in vivo. *Current Biology*. 2016;26(19):2602–2608.
70. Faits MC, Zhang C, Soto F, Kerschensteiner D. Dendritic mitochondria reach stable positions during circuit development. *Elife*. 2016;5:e11583.
71. Smit-Rigter L, Rajendran R, Silva CA, Spierenburg L, Groeneweg F, Ruimschotel EM, et al. Mitochondrial dynamics in visual cortex are limited in vivo and not affected by axonal structural plasticity. *Current Biology*. 2016;26(19):2609–2616.
72. Kubo R. The fluctuation-dissipation theorem. *Reports on progress in physics*. 1966;29(1):255.
73. Lehner B, Kaneko K. Fluctuation and response in biology. *Cellular and Molecular Life Sciences*. 2011;68(6):1005–1010.
74. Sato K, Ito Y, Yomo T, Kaneko K. On the relation between fluctuation and response in biological systems. *Proceedings of the National Academy of Sciences*. 2003;100(24):14086–14090.
75. Wolf L, Silander OK, van Nimwegen E. Expression noise facilitates the evolution of gene regulation. *Elife*. 2015;4:e05856.
76. Bódi Z, Farkas Z, Nevozhay D, Kalapis D, Lázár V, Csörgő B, et al. Phenotypic heterogeneity promotes adaptive evolution. *PLoS biology*. 2017;15(5):e2000644.
77. Yang Z, Steele DS. Effects of cytosolic ATP on spontaneous and triggered Ca<sup>2+</sup>-induced Ca<sup>2+</sup> release in permeabilised rat ventricular myocytes. *The Journal of Physiology*. 2000;523(1):29–44.
78. MATLAB. version 9.5 (R2018b). Natick, Massachusetts: The MathWorks Inc.; 2018.



## Supporting information

### Supporting Data

Data for generating Figures 2 through 9, as well as Matlab [78] scripts to generate those figures are provided as Supporting Material.

### Supporting Figures

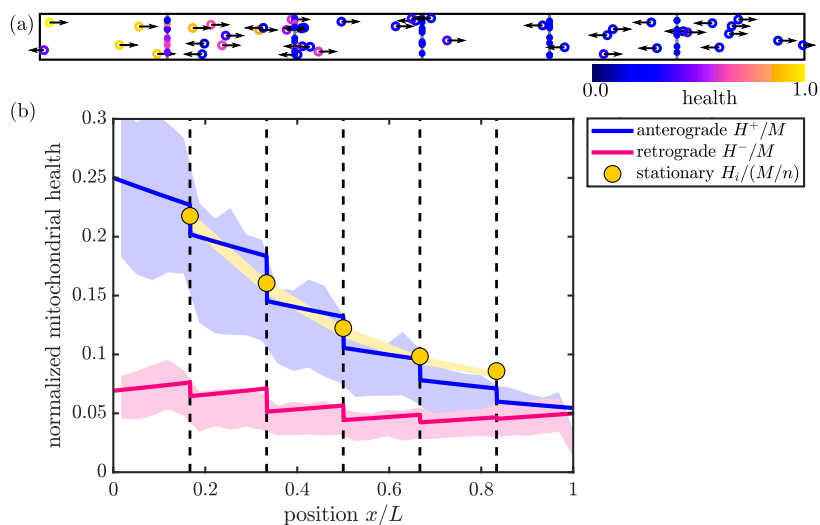

**Fig S1.** Figure supplement for Fig. 2. (a) Snapshot of stochastic simulation of the SS model, with  $M = 100$ . (b) Steady-state solution for mitochondrial health in the SS model. Solid curves show linear density of mitochondrial health in anterograde (blue) and retrograde (magenta) mitochondria, normalized by total number of mitochondria in the domain. Yellow circles show total health at each of the discrete demand sites (dashed black lines), normalized by the total number of mitochondria per region. Shaded regions show corresponding quantities from discrete stochastic simulations (mean  $\pm$  standard deviation) with  $M = 1500$  mitochondria in the domain. Parameters used in (a) and (b):  $n = 5$ ,  $p_s = 0.4$ ,  $f_s = 0.5$ .

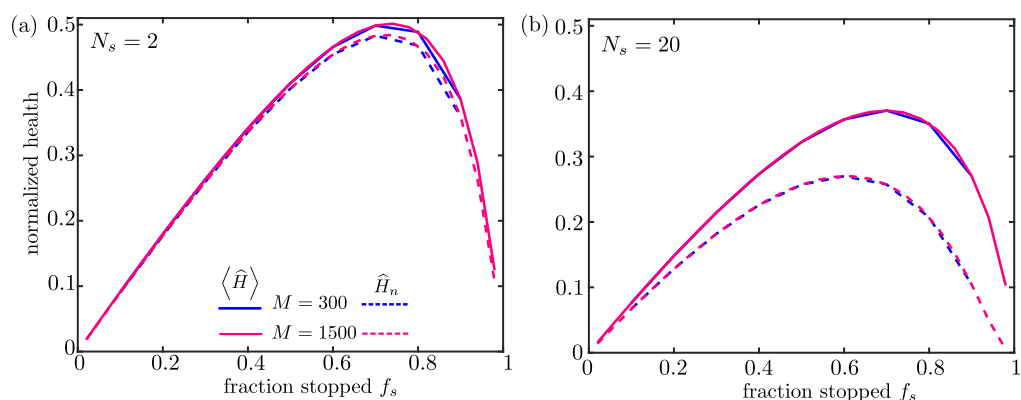

**Fig S2.** Figure supplement for Fig. 4. Mitochondrial health as a function of key dimensionless parameters. Solid curves show normalized average health over all demand sites; dashed curves show normalized health at the most distal site. The total number of mitochondria is set to  $M = 300$  (blue) or  $M = 1500$  (magenta). For each fraction of stationary mitochondria the fusion probability is adjusted to give a fixed number of stopping events for an individual protein traversing the domain: (a)  $N_s = 2$  and (b)  $N_s = 20$ . All values shown are for the SS model, with  $n = 30$  and  $\hat{k}_d = 0.06$ .

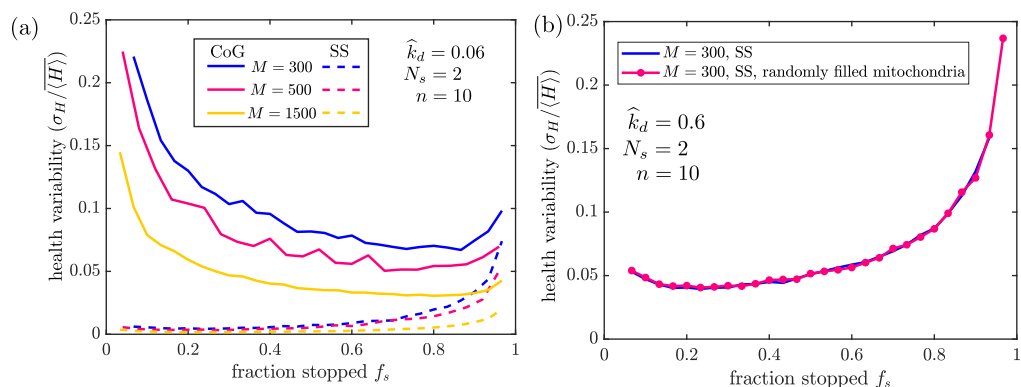

**Fig S3.** Figure supplement for Fig. 6. (a) Variability of mitochondrial health in different maintenance models, with low dimensionless decay rate  $\hat{k}_d = 0.06$ . Results are shown for 300 (blue), 500 (magenta), and 1500 (yellow) average mitochondria in the domain. Solid lines correspond to simulations of the CoG model and dashed lines to the SS model. (b) Health variability in the SS model does not depend on how stationary mitochondria are distributed among sites. Results plotted are for decay rate  $\hat{k}_d = 0.6$ , and number of mitochondria  $M = 300$ . Blue: equal number of mitochondria are placed at each demand site. Magenta: position of each stationary mitochondrion is selected uniformly at random among the demand site locations. Each iteration starts from an independently selected mitochondrial distribution. In all plots, variability is computed over 1000 independent iterations of stochastic simulations, using  $n = 10$  demand site and average stopping number  $N_s = 2$ .

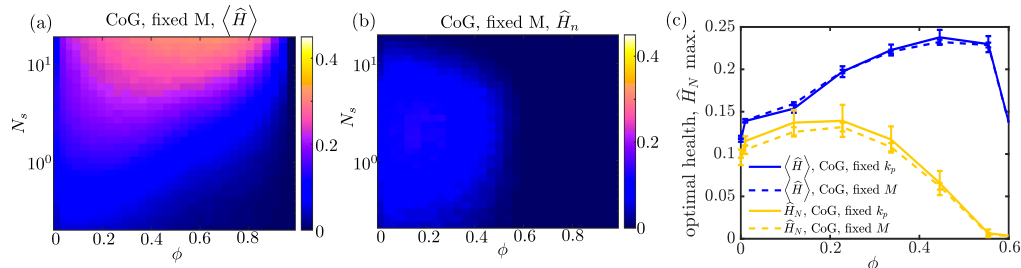

**Fig S4.** Figure supplement for Fig. 8. Rescaling health levels by total mitochondrial content is equivalent to a model with explicitly fixed number of mitochondria. (a-b) Average health across all regions (a), and health of last region (b), for simulations of a modified CoG model with fixed  $M = 150$ , to be compared to Fig. 8b-c. Health levels are normalized by  $M/n$  for both models. (c) Average health (blue) and last region health (yellow) for parameters that optimize the last region health at each fixed value of  $\phi$ . Solid lines show the CoG model with  $k_p$  values fixed as the mitophagy threshold is varied (identical to curves in Fig. 9b). Dashed lines show corresponding plots for the model with explicitly fixed number of mitochondria  $M$ .

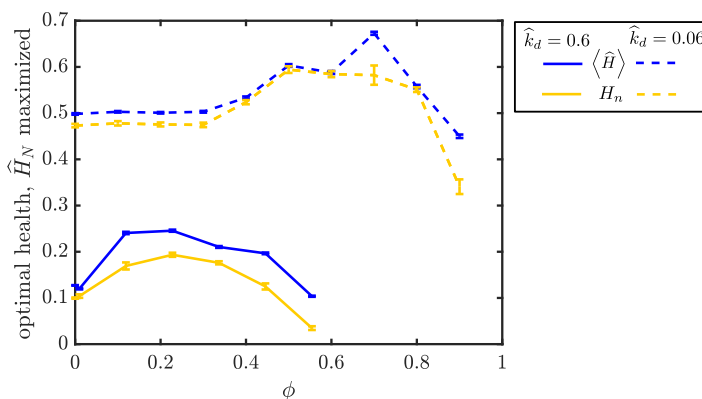

**Fig S5.** Figure supplement for Fig. 9. Optimal performance SS model in the presence of mitophagy, for different health decay rates. For each value of  $\phi$ , the parameters  $f_s$  and  $N_s$  were optimized to yield the maximal health in the most distal region. Plotted are the resulting normalized health levels in the distal region (yellow) and averaged over all regions (blue). The health decay rate was set to  $\hat{k}_d = 0.6$  (solid) and  $\hat{k}_d = 0.06$  (dashed). Lower decay rates correspond to a higher mitophagy cutoff value  $\phi$  that yields the maximal overall health. All health levels are normalized by total mitochondrial content per region ( $M/n$ ), corresponding to a system where the total amount of mitochondrial material is limited. Error bars show SEM.
